# Supplementary material for: Improving Methods for Analyzing Antimalarial Drug Efficacy Trials: Molecular Correction Based on Length-Polymorphic Markers msp-1, msp-2, and glurp
Source: PubMed Central journal article supplement (PMC6709465; doi:10.1128/aac.00590-19), 2019-08-23
Supplement: AAC.00590-19-s0002.pdf [file AAC.00590-19-s0002.pdf]

1 **Supplemental Material**

2

3 **Additional Methodology**

4 **Simulating parasite dynamics post-treatment *in silico* with a pharmacokinetic pharmacodynamic**  
5 **(PK/PD) model – choice of parameters and validity of the results with use of other parameters.**

6 These relate to drug concentration (blue line in Figure 1) and changes in parasite number over time  
7 (red, green, grey and orange lines in Figure 1).

8 Pharmacokinetics (PK) determines a drug’s concentration-time profile (solid blue line in Figure 1).

9 Pharmacodynamics (PD) describes the sensitivity of the parasites to the drug and determines how the  
10 number of parasites changes as a function of drug concentration within a patient over time (dotted  
11 lines in Figure 1

12 Three artemisinin-based combination therapies (ACTs) were investigated in this study:  
13 Dihydroartemisinin-Piperaquine (DHA-PPQ), Artemether-Lumefantrine (AR-LF) and Artesunate-  
14 Mefloquine (AS-MQ). The mechanistic simulation of these drugs has been defined, calibrated and  
15 validated extensively in our previous work e.g. (1-5). The parameterization of these drugs in these  
16 simulations is provided in Table S1. Patient weight in the simulations (involved in the calculation of  
17 PK parameters for PPQ) was drawn from a uniform distribution between 45-75 kg. PK parameters for  
18 all drugs vary extensively in the literature, a fact that is not surprising given that studies are drawn  
19 from a variety of patient populations (see (5) for examples). We do not try to replicate any *given*  
20 population (and thus, their PK values) – rather we choose a mean value that reflects a large proportion  
21 of studies and choose a coefficient of variation (CV) for each parameter that is sufficiently large to  
22 encompass a sensible range of parameters (and consequently, drug concentration over time profiles),  
23 in order to model a “general” patient population over our large trial size (5,000 patients). These values  
24 are shown in full in Table S1 .

25 There is evidence of DHA-PPQ having high estimated failure rates *in vivo*, and well-documented PD  
26 parameterization for this ACT as it fails (Saunders and colleagues (6) estimated PPQ IC50 had increased  
27 to 23.9ng/ml in recrudescence infections as resistance spread; this is equivalent to 0.024 mg/L which  
28 we round to 0.02mg/L in our calibration, see Table S1 ). Consequently, simulating failing DHA-PPQ  
29 using *in vivo* data to calibrate the model was possible and produced a 12% true failure rate with the  
30 MOI from Tanzania described in methods. There are field data allowing calibration of PK/PD  
31 parameters for non-failing AR-LF and AS-MQ (the *in vivo* parameters given in Table S1 that produce a  
32 0.05% and 2% true failure rate respectively. Ideally, we would use field PK/PD calibrations for each  
33 ACT obtained from locations where the drug was failing but failing AR-LF and AS-MQ have not been  
34 observed in any known PK/PD studies. To avoid drawing conclusions based on analysis of a single  
35 failing drug (i.e. DHA-PPQ), we produced ‘failing’ calibrations of AR-LF and AS-MQ by artificially  
36 increasing the parasites’ mean IC50 values (Table S1 ) until the simulated drug failure rates reached  
37 9% and 10% respectively. This reflected plausible future scenarios that may occur as resistance arises  
38 to these drugs. We inflated failure rates to around 10% because this is the critical point at which WHO  
39 recommend a drug be withdrawn from front-line usage (7) so it was important to evaluate the  
40 accuracy of the various methods around this critical point. LF and MQ have very different durations of  
41 protection post-treatment so comparison of the three failing drugs allowed us to investigate different  
42 durations of follow-up post treatment. Note that we only changed the IC50 of the partner drug, to get  
43 high levels of failure for AR-LF and AS-MQ and did not alter sensitivity to the artemisinin component;  
44 drug failures still must survive artemisinin killing thus these partner-drug IC50 values may be higher  
45 than would be expected for monotherapy resistance.

46 The parasite dynamics for DHA-PPQ in the main text were created using a one-compartment PK model  
47 for DHA and a two-compartment PK model for PPQ (parameters in Table S1 ). Reported PK values for  
48 PPQ vary widely in the literature (see (5) for examples though note this is obviously unsurprising as PK  
49 values are drawn from studies of different populations) and PPQ can be calibrated in a one, two or  
50 three compartment model. To show our results are consistent across multiple PK calibrations and for

51 completeness, we generated parasite dynamics using a three-compartment model described in (8)  
52 with PK parameters based on the mean values reported in table 2 of (8) and in our Table S2.  
53 Comparison of drug concentration over time for a single patient with this three compartment  
54 calibration and the two compartment calibration (i.e., mean parameters shown in Table S1 against  
55 mean parameters in table 2 of (8)) is shown in Figure S1.

56 Note that we did not incorporate the error model or covariate effects described in (8); we were not  
57 trying to re-create their patient population (which is a mix of pregnant and non-pregnant women),  
58 rather we were trying to create parasite dynamics for a general patient population under the  
59 assumption of a three compartment PPQ model and so use the mean values for PK parameters in (8)  
60 as a base. As with the parameterizations for two-compartment PPQ and the other drugs, we then used  
61 relatively large coefficients of variation across 5,000 patients (Table S2 ).

62 The principal difference between the parasite dynamics generated with these assumptions is that the  
63 three-compartment model is slightly more prophylactic and has a greater total area under the drug  
64 kill curve; consequently, true failure rate is slightly lower, and a smaller number of reinfections  
65 become patent. However, failure rate estimates obtained using each algorithm are not significantly  
66 different between the two compartment and three compartment models, and we later show our  
67 results (the relative performance of molecular correction algorithms) are qualitatively the same with  
68 both model calibrations. We are not attempting to comment, here, on whether DHA-PPQ is best  
69 represented by a two or three compartment model or its exact parameterization. Furthermore, we  
70 are not trying to reproduce the PK of a given population of patients reported anywhere in the  
71 literature, but rather produce a general population of patients with parasite dynamics post-treatment  
72 we can use to analyse molecular correction algorithms (which we achieve by setting the CV on our  
73 parameters such that we cover a wide range). We simply confirm and stress the consistency of the  
74 molecular correction algorithms across both parameterizations, suggesting that, regardless of the

75 number of PPQ PK compartments included, our conclusions regarding the accuracy of these molecular  
76 correction algorithms to estimate treatment failure rates are robust.

77 We did not have access to validated PK/PD models for other common partner drugs i.e. Amodiaquine  
78 (AQ), sulfadoxine/pyrimethamine (SP) and pyronaridine. Both the parent form and metabolite of AQ  
79 have antimalarial activity, they are both best described with multiple PK compartment models and  
80 both are eliminated independently (e.g. (9)): we were unable to obtain robust PK/PD models (10). SP  
81 exhibits strong synergy between the sulfadoxine and pyrimethamine components which again makes  
82 it difficult to get a robust PK/PD model (11). Finally, pyronaridine is so new that we have not yet had  
83 the time or resources to attempt a PK/PD model of this treatment. However, the three drugs that we  
84 can investigate have different periods of chemoprophylaxis post treatment and are likely good guides  
85 for other drugs: specific calibrations of PK/PD models cannot affect the genetic profiles obtained prior  
86 to treatment and there seems no obvious reason why they would alter the genetic profiles of recurrent  
87 infections. so we argue that the three examples are sufficient to generate robust results for the  
88 analysis of *m*sp-1, *m*sp-2 and *glurp* markers.

89

#### 90 ***Force of Infection: the rate of emergence of reinfections during the follow-up period***

91 Our selection of FOI values was based on the following literature: Data from northern Ghana indicates  
92 that the average number of reinfections per patient per year was 16, and similar estimates can be  
93 obtained from efficacy data of effective ACTs (see supplementary material of (2)). Mueller et al. (12)  
94 obtain estimates of between 3 and 9 reinfections emerging per year with an average of 5.9 in Papa  
95 New Guinea. Additional work suggests the FOI in Ghana is highly seasonal with estimates ranging from  
96 44 in the high transmission season to 7 in the low transmission season (13); any yearly average (such  
97 as assumed in this manuscript) will fail to capture the nuances of seasonal transmission. Smith et al.  
98 (14) explicitly modelled the relationship between EIR and FOI. It is technical, but some illustrative data  
99 are summarised in their Figure 2: Incidence during a 2 week period at annual EIRs of 36.5 (moderate

100 transmission) and 365 (high transmission) were roughly 0.2 and 0.4 respectively implying annual FOI  
101 estimates of  $0.2 \times 26 = 5.2$  and  $0.4 \times 26 = 10.4$  respectively. These may be slight under-estimates because  
102 this simple calculation assumed that more than one infection could not become established in a 2  
103 week period but serves as general illustrations of the relationship between EIR and FOI.

#### 104 **Additional Results**

##### 105 **Misclassification of recurrent infections for DHA-PPQ with varying FOI levels**

106 Figure 3 (main text) shows the misclassification of recurrent infections (recrudescence classified as  
107 reinfection and vice versa) for an FOI of 8. Figure S2 shows the same plot for an FOI of 2, 8, and 16. It  
108 shows that the number of recrudescence misclassified as reinfection is stable as FOI increased for all  
109 algorithms. Furthermore, it shows that increased FOI had nearly no impact on the number of  
110 reinfections being misclassified for the “WHO/MMV” algorithm (which correctly classified all  
111 reinfections), and a very minor impact for the “no glurp” algorithm. For the “ $\geq 2/3$  markers” and “allelic  
112 family switch” algorithm, this figure demonstrates that increased FOI led to greatly increased numbers  
113 of reinfections being misclassified as recrudescence. The *proportion* of reinfections misclassified was  
114 stable as FOI increased, but the greater total number of misclassifications produced the increased  
115 failure rates seen with these algorithms in Figure 4 (main text).

##### 116 **Results for failing DHA-PPQ with a three-compartment calibration**

117 We generated parasite dynamics for each patient using a three-compartment model calibration for  
118 DHA-PPQ (rather than the two-compartment calibration shown in the main text), i.e. Table S2 . The  
119 results are shown in Figure S3. The qualitative patterns were the same as for the two-compartment  
120 model, i.e., that “WHO/MMV” algorithm produced the lowest failure rate estimate, then “no glurp,”  
121 then “ $\geq 2/3$  markers”, then “allelic family switch” (at most FOI, “ $\geq 2/3$  markers” produced a slightly  
122 higher failure rate estimate at 0-2 FOI). True failure rate was slightly lower for the three compartment  
123 model (10% vs 12%). Failure rate estimates with all algorithms, given the same length of follow-up and

124 FOI, were lower with a three compartment model (likely due to its longer prophylactic period, see  
125 Figure S1). Thus, while the “ $\geq 2/3$  markers” algorithm produced an accurate estimate at most FOI  
126 (though “no correction” is better with an FOI of 0) with a 42 day follow-up for a two compartment  
127 model, assuming a three compartment model of DHA-PPQ showed that “ $\geq 2/3$  markers” produced  
128 accurate failure rate estimates but with a follow-up period of 63 days; an intuitive result given the  
129 longer prophylactic period.

130

131 **Results for failing Artemether-Lumefantrine (AR-LF) and failing Artesunate-Mefloquine (AS-MQ)**  
132 **compared with failing Dihydroartemisinin-Piperaquine (DHA-PPQ): The impact of different**  
133 **correction algorithms on estimated drug failure rates, and appropriate durations of trial follow-up.**

134

135 We investigated failing AR-LF and failing AS-MQ to confirm that the same patterns were observed as  
136 for failing DHA-PPQ. The results are discussed here to save space and to maintain focus on the key  
137 points in the main manuscript.

138

139 Failure rate estimates for DHA-PPQ with 28, 42 and 63 day follow-up periods are shown in Figure 4  
140 Failure rate estimates increased as follow-up length increases because a) more true recrudescences  
141 became patent and b) more reinfections became patent that may be misclassified as recrudescence  
142 (see discussion in main manuscript Figure 4). Consequently, our results (main text) suggested that use  
143 of the “ $\geq 2/3$  markers” algorithm and a 42-day follow-up was the most appropriate option for DHA-  
144 PPQ trials.

145

146 Failure rate estimates for failing AR-LF for 21-day and 28-day follow-up lengths are presented in Figure  
147 S4 . The true failure rate of AR-LF in these simulations was 0.918 (9%). The same pattern was observed  
148 as for DHA-PPQ: The non-PCR corrected algorithm over-estimated the failure rate at any FOI higher

149 than 1, and severely overestimated failure rates at high FOI; the “WHO/MMV” algorithm and the “no  
150 glurp” algorithm slightly under-estimated the failure rate across all levels of FOI. Use of a 21-day  
151 follow-up period led to both the “allelic family switch” algorithm and the “ $\geq 2/3$  markers” algorithm  
152 under-estimating the failure rate, only at a high FOI of 13 did the allelic family switch algorithm  
153 accurately recover the true failure rate. Use of a 28-day follow-up period produced more accurate  
154 failure rate estimates: The “ $\geq 2/3$  markers” algorithm accurately recovered the true failure rate  
155 between an FOI of 5-16, with both the “ $\geq 2/3$  markers” algorithm and the “allelic family” switch  
156 algorithm under-estimating the failure rate slightly at lower FOI. These results combined with the true  
157 classifications of recurrent infections recrudescences and reinfections (Figure S5 ) suggested a 28-day  
158 follow-up period led to more accurate failure rate estimates.

159

160 Failure rate estimates for failing AS-MQ for a 42, 49 and 63-day follow-up length are presented in  
161 Figure S6 . The true failure rate of AS-MQ in these simulations was 0.1032(10%). With a 42-day follow-  
162 up period (Figure S6 (A)), the “ $\geq 2/3$  markers algorithm” under-estimated the true simulated failure  
163 rate at all FOI settings – the “allelic family switch” and “ $\geq 2/3$  markers” algorithm were close in value  
164 up to an FOI of 9-10. As with DHA-PPQ and AR-LF, the “WHO/MMV” and “no glurp” algorithms under-  
165 estimated the failure rate consistently and using no PCR correction generated a large over-estimate  
166 of the true failure rate. We simulated a novel follow-up length of 49 days (Figure S6 (B)) under which  
167 the “ $\geq 2/3$  markers” algorithm produced a more accurate failure rate estimate than a 42-day follow-  
168 up at all FOI levels. With a 63-day follow-up period (Figure S6 (C)), the “allelic family switch” algorithm  
169 over-estimated the true failure rate from an FOI of 4 and upwards. The “ $\geq 2/3$  markers” algorithm  
170 over-estimated from an FOI of 8 and up, but only by a small amount. AS-MQ is more prophylactic than  
171 DHA-PPQ and AR-LF: Given the same period of follow-up, fewer reinfections became patent, and  
172 recrudescences occurred later in the follow-up period (Figure S7 ). As such, it was unsurprising that a  
173 longer period of follow-up led to more accurate failure rate estimates. Using the “ $\geq 2/3$  markers”  
174 algorithm and assuming an FOI of  $<8$ , a 63-day follow-up period resulted in a more accurate estimate

175 than the 42 and 49-day follow-up lengths, but the differences in estimates between 49 and 63 days  
176 were small and the operational, logistical advantages of a 49-day trial over a 63-day trial are likely to  
177 be substantial. Furthermore, with an FOI of  $\geq 8$ , a shorter follow-up (49 days) produced a more  
178 accurate failure rate estimate with the “ $\geq 2/3$  markers” algorithm – a 63 day follow-up period over-  
179 estimated the true failure rate slightly with higher transmission intensity using this algorithm.

180

181 In summary, the results for the three failing drug calibrations differed slightly quantitatively, but the  
182 same qualitative patterns occurred i.e. the “WHO/MMV” method returned large underestimates  
183 (around two thirds the true value) of failure rates, while the “ $\geq 2/3$  markers” algorithm produced  
184 consistently more accurate estimates, with some dependency on transmission intensity (quantified by  
185 FOI). Increased length of follow-up increased failure rate estimates, as for DHA-PPQ, though due to  
186 the different prophylactic profiles of the drugs the accuracy of failure rate estimates at a given length  
187 of follow-up differed.

188

### 189 **Results for non-failing (effective) AR-LF and AS-MQ**

190

191 The simulations were run for the non-failing (i.e. effective drug) PK/PD calibrations for AR-LF (Figure  
192 S8) and AS-MQ (Figure S9 ), which had true failure rates of 0.0046 (0.5%) and 0.0208 (2%) respectively.  
193 This was to investigate whether the new algorithms could incorrectly classify effective drugs as failing.  
194 Crucially, the under-estimate associated with of the “ $\geq 2/3$  markers” algorithm was so small in terms  
195 of absolute value that the use of the algorithm can be recommended without concern for over-  
196 estimating the failure rate of effective drugs i.e. there is no danger of an effective drug being  
197 misclassified as failing. These results do highlight the dangers of not using a molecular correction: The  
198 non-PCR-corrected algorithm generated estimated failure rates  $>10\%$  in areas of high FOI when using  
199 long durations of follow-up. The WHO recommend that drugs be replaced when failure rates exceed  
200  $10\%$  (7), so not using molecular correction could lead to unwarranted policy change.



201  
202  
203  
204  
205  
206  
207  
208  
209  
210  
211  
212  
213  
214  
215  
216  
217  
218  
219  
220  
221  
222  
223  
224

**Sensitivity analysis of multiplicity of infection (MOI), relative detectability of alleles and the minority allele detection threshold**

The results presented in the main text all assumed MOI at time of treatment is representative of high transmission i.e. using Tanzanian data (see MOI in main text). We did this because high MOI makes detection of recrudescence alleles more difficult (due to the issues described in our methods section with detection of minority alleles) so represents a “worst case” scenario. There is a likely mismatch for areas of low transmission which have lower MOI at treatment, but we used high MOI across all transmission intensities (quantified by FOI) for the following reasons:

- Keeping the same MOI across all transmission intensities allowed a direct comparison of molecular correction algorithms (e.g. Figure 2, Figure 4)
- This assumption of high MOI at treatment is conservative (i.e. “worst case” scenarios) for low transmission areas because we show that there is little operational difference between the algorithms even if initial MOI is high; it is therefore a robust conclusion that algorithm choice is not important in these areas because if MOI at treatment is lower, then there will be even less difference between the algorithms (as illustrated by the Cambodian field data that showed negligible differences).
- High MOI at time of treatment can occur even in low transmission areas if people immigrate from areas of higher transmission or have acquired sufficient protective immunity that several clones may co-circulate asymptomatically before the patient falls ill. More plausibly, this scenario may arise in areas of seasonally intense transmission where MOI at time of treatment is high, but trials are conducted during the low-transmission season to reduce the impact of reinfections.

225 We checked the impact of reduced MOI. Analysis of simulated data for DHA-PPQ with a 42-day follow-  
226 up and a low MOI setting (the distribution obtained from PNG; see methods) is shown in Figure S10.  
227 First note that the true failure rate was slightly lower than that obtained in a high MOI setting (Figure  
228 4) because patients harboured fewer clones at time of treatment which made their infection easier to  
229 clear. Reducing the MOI to reflect a low-transmission setting reduced the difference between  
230 algorithms. Overall, the results were consistent with those obtained from a high MOI setting i.e. the  
231 “allelic family switch” algorithm produced an accurate failure rate estimate at an FOI of 4 and below,  
232 and the “ $\geq 2/3$  markers” algorithm produced the most accurate failure rate estimate at all higher FOI.

233

234 The relative detectability of the longest allele to the shortest allele was altered from 0.001:1 to 0.1:1.  
235 The results are shown in Figure S11. Failure rate estimates obtained using this altered relative  
236 detectability are nearly identical to those obtained with the relative detectability of 0.001:1 used  
237 elsewhere in this manuscript (i.e. Figure 2 of main text).

238

239 The threshold at which minority genotyping signals are discounted as “noise” and disregarded was  
240 varied from 0.3 to 0.05. Analysis of simulated data for DHA-PPQ with a 42-day follow-up under these  
241 conditions is shown in Figure S12. The failure rate estimate produced by each algorithm increased as  
242 the threshold decreased. At the lower threshold of 0.05 the “no glurp” algorithm (rather than the “ $\geq$   
243  $2/3$  markers” algorithm) produced the most accurate failure rate estimate from an FOI of 6 and higher.  
244 A minority detection threshold of 0.05 is unrealistic because large amounts of  
245 experimental/laboratory noise would be included in the signal, so this threshold could not be used in  
246 practice. The threshold was changed to 0.2 (a more realistic value) in Figure S13. Under this  
247 assumption the “ $\geq 2/3$  markers” algorithm produced the most accurate failure rate estimate, robust  
248 across all FOI levels, the same as when the minority detection threshold is set to 0.3.

249

250 **Per protocol vs survival analysis for using the molecular correction data to obtain estimated failure**  
251 **rates.**

252

253 WHO guidelines (7) recommend two methods for statistical analysis of molecular-corrected data:  
254 Survival analysis and per-protocol analysis. The results presented in the main manuscript and this  
255 supplemental material for DHA-PPQ, AR-LF, and AS-MQ are failure rate estimates obtained using  
256 survival analysis. The same models were analysed to obtain failure rate estimates calculated using per-  
257 protocol method (Figure S14 to Figure S16). Comparison of these results showed that the per protocol  
258 method generates slightly higher estimated failure rates than survival analysis. The differences were  
259 dependant on the FOI level and duration of follow-up – the more reinfections that become patent  
260 over the course of follow-up (as occurs with higher FOI and longer follow-up), the greater this  
261 difference. With a 63-day follow-up and an FOI of 16 the failure rate estimate obtained for DHA-PPQ  
262 with the per-protocol method was nearly 30%, compared to the estimate with survival analysis of 15%.  
263 The reason is a “denominator effect”. The per-protocol analysis simply removes all patients identified  
264 with reinfections from the analysis. Take the example where 20 of 200 patients are drug failures, giving  
265 a true underlying failure rate of  $20/(20+180)=10\%$ . If, for example, 50 of the 180 cured patients had  
266 reinfections and were removed from the analysis then the estimated per-protocol failure rate would  
267 rise to  $20/(20+130)=13\%$  and if 100 of the cured patients had reinfections then failure rate would  
268 further increase to  $20/(20+80)=20\%$ . This example is somewhat artificial because reinfections will also  
269 occur in the recrudescence group and if they occur first, a later recrudescence could be masked, but  
270 it does serve to illustrate this denominator effect. It is important to appreciate that use of the per-  
271 protocol method with the newly proposed “ $\geq 2/3$  markers” algorithm (which generally produced more  
272 accurate failure rate estimates with appropriate follow-up length, see main text) will result in an over-  
273 estimate of failure rate. A detailed discussion of statistical analysis of malaria drug trials can be found

274 elsewhere (15) but here we emphasise that reporting the failure rate estimate obtained through  
275 survival analysis is essential with the use of this new algorithm.

276

## 277 **Additional discussion**

### 278 **Alternative markers for molecular correction**

279

280 We focused on the currently recommend WHO genetic markers and methods in the main text.  
281 Optimising their use is the current priority but looking forward, there are alternative methodologies  
282 and markers than may be used and which may be superior. These markers and methods will be  
283 addressed in future studies but, for the record, the three main alternative markers are as follows.

- 284 • Amplicon sequencing of marker loci (16). Its main advantage over capillary electrophoresis of  
285 *msh-1*, *msh-2* and *glurp* is that deep sequencing allows very sensitive detection of minor  
286 clones. Minority clones that had a frequency >1.0% of all reads were consistently detected  
287 (16). We anticipate that this sensitivity will favour a “WHO/MMV”-type algorithm (i.e. a  
288 recrudescence should share alleles at all amplicons when comparing initial and recurrent  
289 samples) as the use of amplicon sequencing should improve detection of minor clones in the  
290 initial sample (reducing the number of recrudescence clones being misclassified as reinfection)  
291 and will be better able to detect recrudescence clones in mixed infection recurrences.
- 292 • Microsatellite loci have already been used in antimalarial efficacy studies (17, 18).  
293 Microsatellites are similar to the *msh-1*, *msh-2*, *glurp* markers as their sensitivity to detect  
294 minor clones is relatively weak (in particular the presence of stutter-bands require a stringent  
295 cut-off) but more loci are often genotyped (Plucinski et al (19) used 8 microsatellites), which  
296 means there are a greater number of potential algorithms that may be constructed to

297 distinguish recrudescences from reinfections. In addition, there is a Bayesian analysis method  
298 for these markers which may improve their role in molecular correction ((17))

- 299 • Finally, SNP barcodes may be used as genetic markers.

300 The intention here is not to provide an exhaustive description of alternative markers but to emphasise  
301 that it is straightforward to assign such genotypes to our simulated patients in the same way that we  
302 assigned the *msh-1*, *msh-2* and *glurp* genotypes, and test various classification algorithms based on  
303 such loci. Finally, we note that existing algorithms simply classify recurrent infections as either  
304 reinfections or recrudescences and do not account for any degree of uncertainty in these  
305 classifications; for example, although we recommend the “ $\geq 2/3$  markers” algorithm, we may be more  
306 confident that a recurrent infection is a drug failure if it shares identical alleles at all 3 loci than if it  
307 shares alleles at only 2 loci. A natural way of incorporating such uncertainty is to use Bayesian methods  
308 and a recent paper has identified such a technique (19); we will evaluate this method in our future  
309 work. In short, validated simulations of drug treatment and the consequent post-treatment parasite  
310 dynamics provide an ideal resource to investigate many issues surrounding the design,  
311 implementation and analysis of clinic trials and we commend their use as a test platform to other  
312 interested parties working to improve the design and analysis of malaria drug clinical trials.

313

| Drug parameter            | Dihydroartemisinin-Piperaquine<br>(two-compartment model) |                 | Artesunate-Mefloquine |                |                             | Artemether-Lumefantrine |                    |                              |
|---------------------------|-----------------------------------------------------------|-----------------|-----------------------|----------------|-----------------------------|-------------------------|--------------------|------------------------------|
|                           | DHA                                                       | PPQ             | AS                    | DHA            | MQ                          | AR                      | DHA                | LF                           |
| Vd (L/kg)                 | 1.49 [0.48](1, 20)                                        | 173 [0.93](21)  | 7.1 [0.94](1)         | 1.49[0.48](1)  | 20.8[0.38](1)               | 46.6[0.82](20)          | 15[0.48](1, 20)    | 21[2.63](1, 20)              |
| Vd <sub>1</sub> (L/kg)    | -                                                         | 443 [1.70](21)  | -                     | -              | -                           | -                       | -                  | -                            |
| ka (/day)                 | -                                                         | 11.2 [2.17](21) | 252[1.12](1)          | -              | -                           | 23.98[0.68](1, 20)      | -                  | -                            |
| z (/day)                  | -                                                         | -               | 30.96[0.362](1)       | -              | -                           | 11.97[0.65](1, 20)      | -                  | -                            |
| Q <sub>1</sub> (L/day/kg) | -                                                         | 69.7[1.01](21)  | -                     | -              | -                           | -                       | -                  | -                            |
| k (/day)                  | 19.8[0.23](3, 20)                                         | 0.02*(21, 22)   | -                     | 25.4[0.23](1)  | 0.053[0.63](1)              | -                       | 44.15[0.23](1, 20) | 0.16[0.05](1, 20)            |
| IC50 (mg/L)               | 0.009 [1.17](1, 20)                                       | 0.02 [0.3](6)   | 0.0016[0.86](1)       | 0.009[1.17](1) | 0.3[0.78] <0.027[0.78]> (1) | 0.0023[0.79](1, 20)     | 0.009[1.17](1, 20) | 4[1.02] <0.032(1.02)>(1, 20) |

|             |                  |               |               |               |               |                   |                   |                   |
|-------------|------------------|---------------|---------------|---------------|---------------|-------------------|-------------------|-------------------|
| <b>Vmax</b> | 27.6[0.3](1, 20) | 3.45[0.3] (3) | 27.6[0.3] (1) | 27.6[0.3] (1) | 3.45[0.3] (1) | 27.6[0.3] (1, 20) | 27.6[0.3] (1, 20) | 3.45[0.3] (1, 20) |
| <b>n</b>    | 4[0.3](1, 3, 20) | 6[0.3] (3)    | 4[0.3] (1, 3) | 4[0.3] (1, 3) | 5[0.3] (1)    | 4[0.3] (1, 3, 20) | 4[0.3] (1, 3, 20) | 4[0.3] (1, 3, 20) |

Table S1 : A summary of the PKPD parameters used to generate parasite dynamics post-treatment; means with coefficient of variation (CV) in square brackets. There are two IC50 values for Lumefantrine (LF) and Mefloquine (MQ): the failing “resistant” IC50s are provided first and drug sensitive IC50 values are shown in </>. Note that IC50 values for failing LF and MQ were arbitrarily increased by us to obtain ~10% drug failure rate. We only changed the IC50 of the partner drug, so to get high levels of failure we needed to overcome the artemisinin component (whose IC50 was not changed) – thus these IC50 values will be higher than those expected for monotherapy resistance. Piperaquine (PPQ) follows a two-compartment model as described in Kay, Hodel & Hastings (21). Patient bodyweight (BW) in the simulations was drawn from a uniform distribution between 45-75 kg and is involved in the calculations for PPQ parameters (see (21, 22)). The numbers provided in brackets in the table are citations in support of the parameter values

PK/PD: Pharmacokinetic/Pharmacodynamic, BW: Patient bodyweight, DHA: Dihydroartemisinin, PPQ: Piperaquine, AS: Artesunate, MQ: Mefloquine, AR: Artemether, LF: Lumefantrine, BW: Patient bodyweight Vd: Volume of Distribution (central compartment for PPQ), Vd<sub>1</sub>: Volume of Distributions (peripheral compartment for PPQ), ka: Absorption rate constant, z: Conversion rate of AR/AS into DHA, Q<sub>1</sub>: Intercompartmental clearance between central and peripheral compartment (for PPQ). k: Elimination rate, IC50: Drug concentration at which 50% of maximal killing occurs, Vmax: Maximal parasite killing constant, n: slope of concentration-effect curve, - : No data / not applicable.

\* elimination rate for PPQ is calculated from clearance (CL) / Vd. CL is not shown here but is  $4.5 * BW^{0.75}$  as in (22); This means that elimination rate varies with body weight ( a common PK observation) so the value presented here is illustrative and represents a bodyweight of 42kg (the median bodyweight in previous studies(21, 22)).



| Drug parameter          | Dihydroartemisinin-Piperaquine (three compartment model) |
|-------------------------|----------------------------------------------------------|
|                         | PPQ                                                      |
| Vd (L)                  | 3070 [0.86](8)                                           |
| Vd <sub>1</sub> (L)     | 4440 [1.21] (8)                                          |
| Vd <sub>2</sub> (L)     | 31400 [0.65] (8)                                         |
| ka (/day)               | 1.99 [1.08] [Table S1 ]                                  |
| Q <sub>1</sub> (L/hour) | 427 [1.01](8)                                            |
| Q <sub>2</sub> (L/hour) | 160 [0.7](8)                                             |
| k (/day)                | 0.47* (8)                                                |
| IC50 (mg/L)             | 0.02 [0.3](6)                                            |
| Vmax                    | 3.45 [0.3](3)                                            |
| n                       | 6 [0.3](3)                                               |

Table S2 : A summary of the PK/PD parameters used to generate parasite dynamics post-treatment PPQ with a three-compartment model (opposed to the two compartment model parameters described in Table S1 ; note that DHA parameters remain the same). PK means are derived from (8); the coefficient of variation CV; in square brackets for each parameter is added by us. PD parameters (IC50, Vmax, n ) are the same as for the two-compartment model. The numbers provided in brackets in the table are citations in support of the parameter values

PK/PD: Pharmacokinetic/Pharmacodynamic, BW: Patient bodyweight, DHA: Dihydroartemisinin, PPQ: Piperaquine, Vd: Volume of Distribution (central compartment for PPQ), Vd<sub>1</sub>: Volume of Distribution (peripheral compartment 1), Vd<sub>2</sub>: Volume of Distribution (peripheral compartment 2), k<sub>a</sub>: Absorption rate constant, z: Conversion rate of AR/AS into DHA, Q<sub>1</sub>: Intercompartmental clearance between central and peripheral compartment 1, Q<sub>2</sub>: Intercompartmental clearance between central and peripheral compartment 2, k: Elimination rate, IC<sub>50</sub>: Drug concentration at which 50% of maximal killing occurs, V<sub>max</sub>: Maximal parasite killing constant, n: slope of concentration-effect curve, - : No data / not applicable.

\* elimination rate for PPQ is calculated from clearance (CL) / Vd; CL (from (8) is 60.2 (we include a CV of 0.71 on this parameter) ) so the value presented here is illustrative and represents a bodyweight of 42kg.

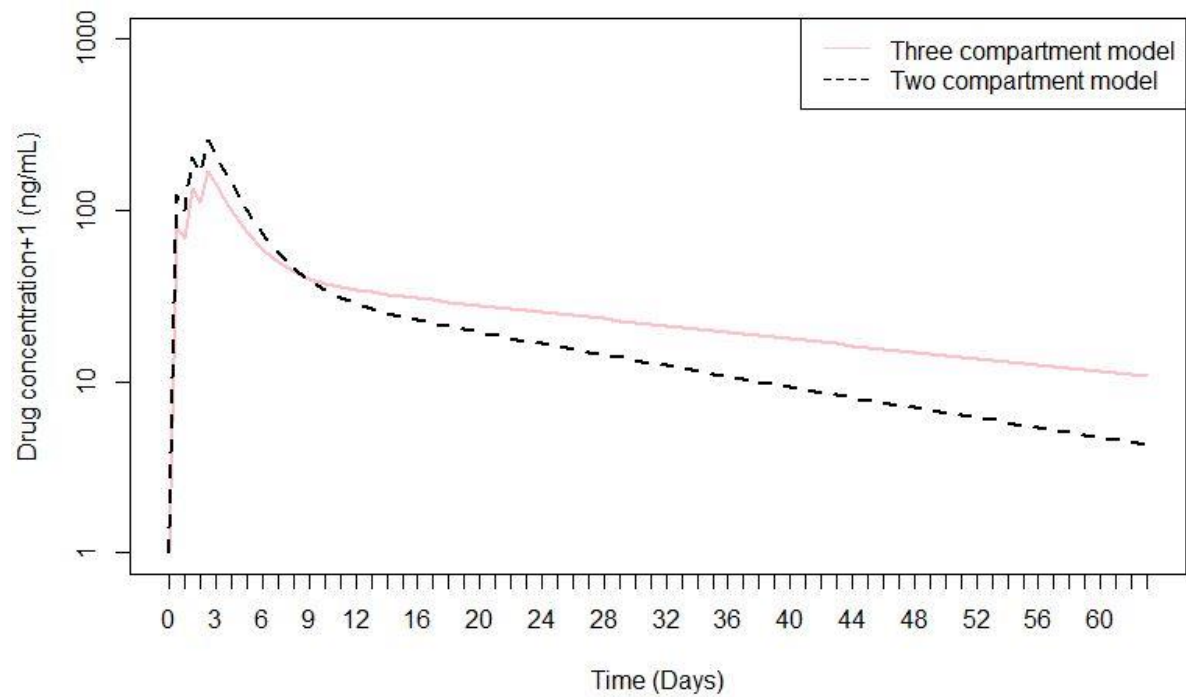

Figure S1: Comparison of drug concentration over time profiles created for a single patient with the mean parameters described in Table S1 for a two-compartment DHA-PPQ model and the mean parameters described in table 2 of (8) for a three compartment DHA-PPQ model, showing that the three compartment model produces a more prophylactic drug concentration over time profile.

FOI = 2

FOI = 8

FOI = 16

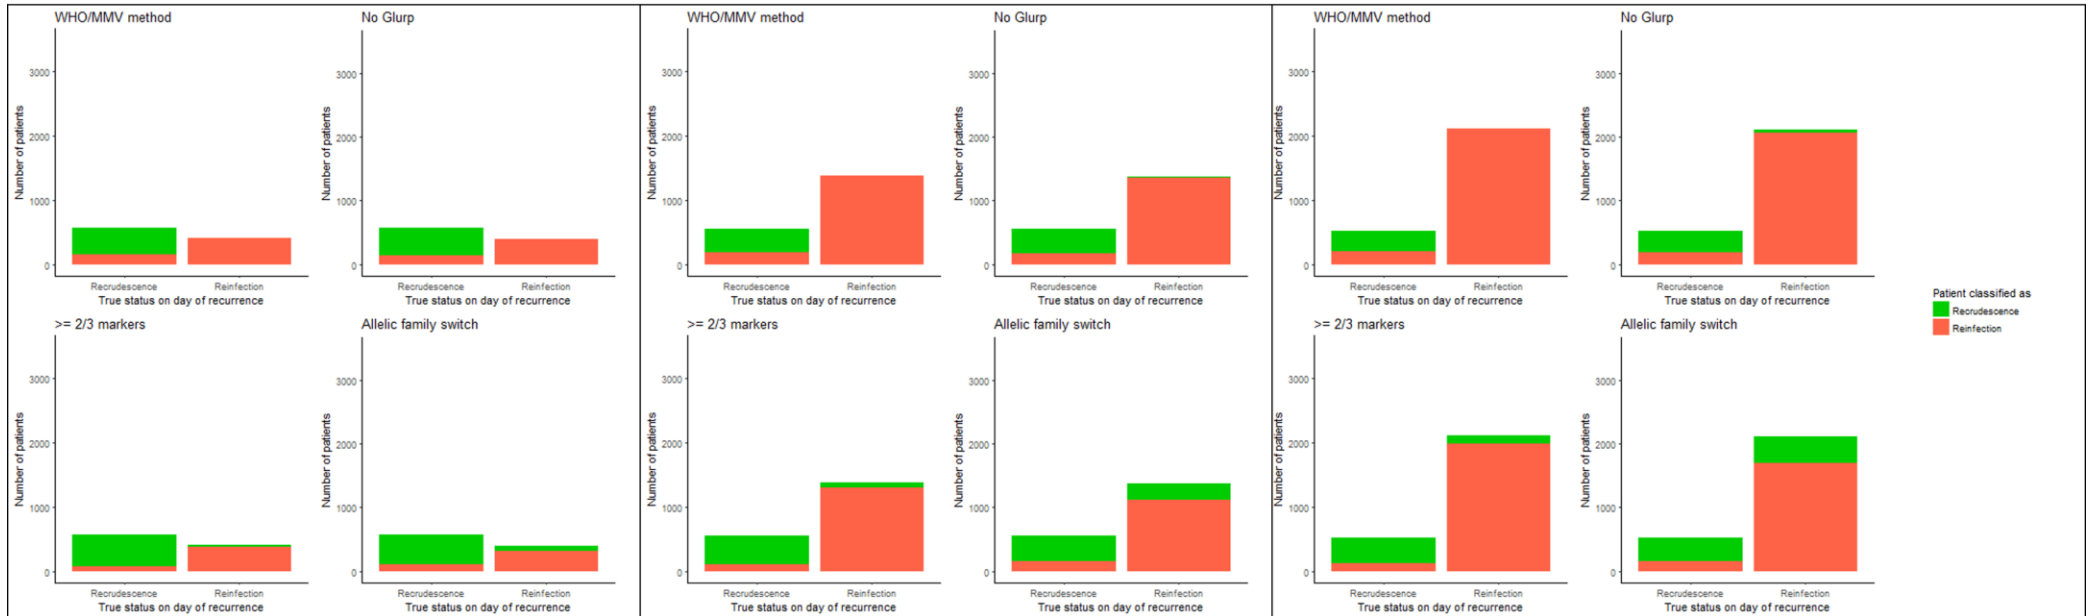

Figure S2 : Figure showing the ability of the various molecular correction algorithms to correctly classify patients with recurrent malaria. The data are for DHA-PPQ with a 42-day follow-up obtained with FOIs of 2, 8 and 16 (8 is identical to Figure 3 (main text)), showing how misclassification by each algorithm alters as FOI changes. The X-axis shows the true status of patients on the day of recurrence (i.e. reinfection or a recrudescence) and the colour-coding shows how these patients were classified by each algorithm.

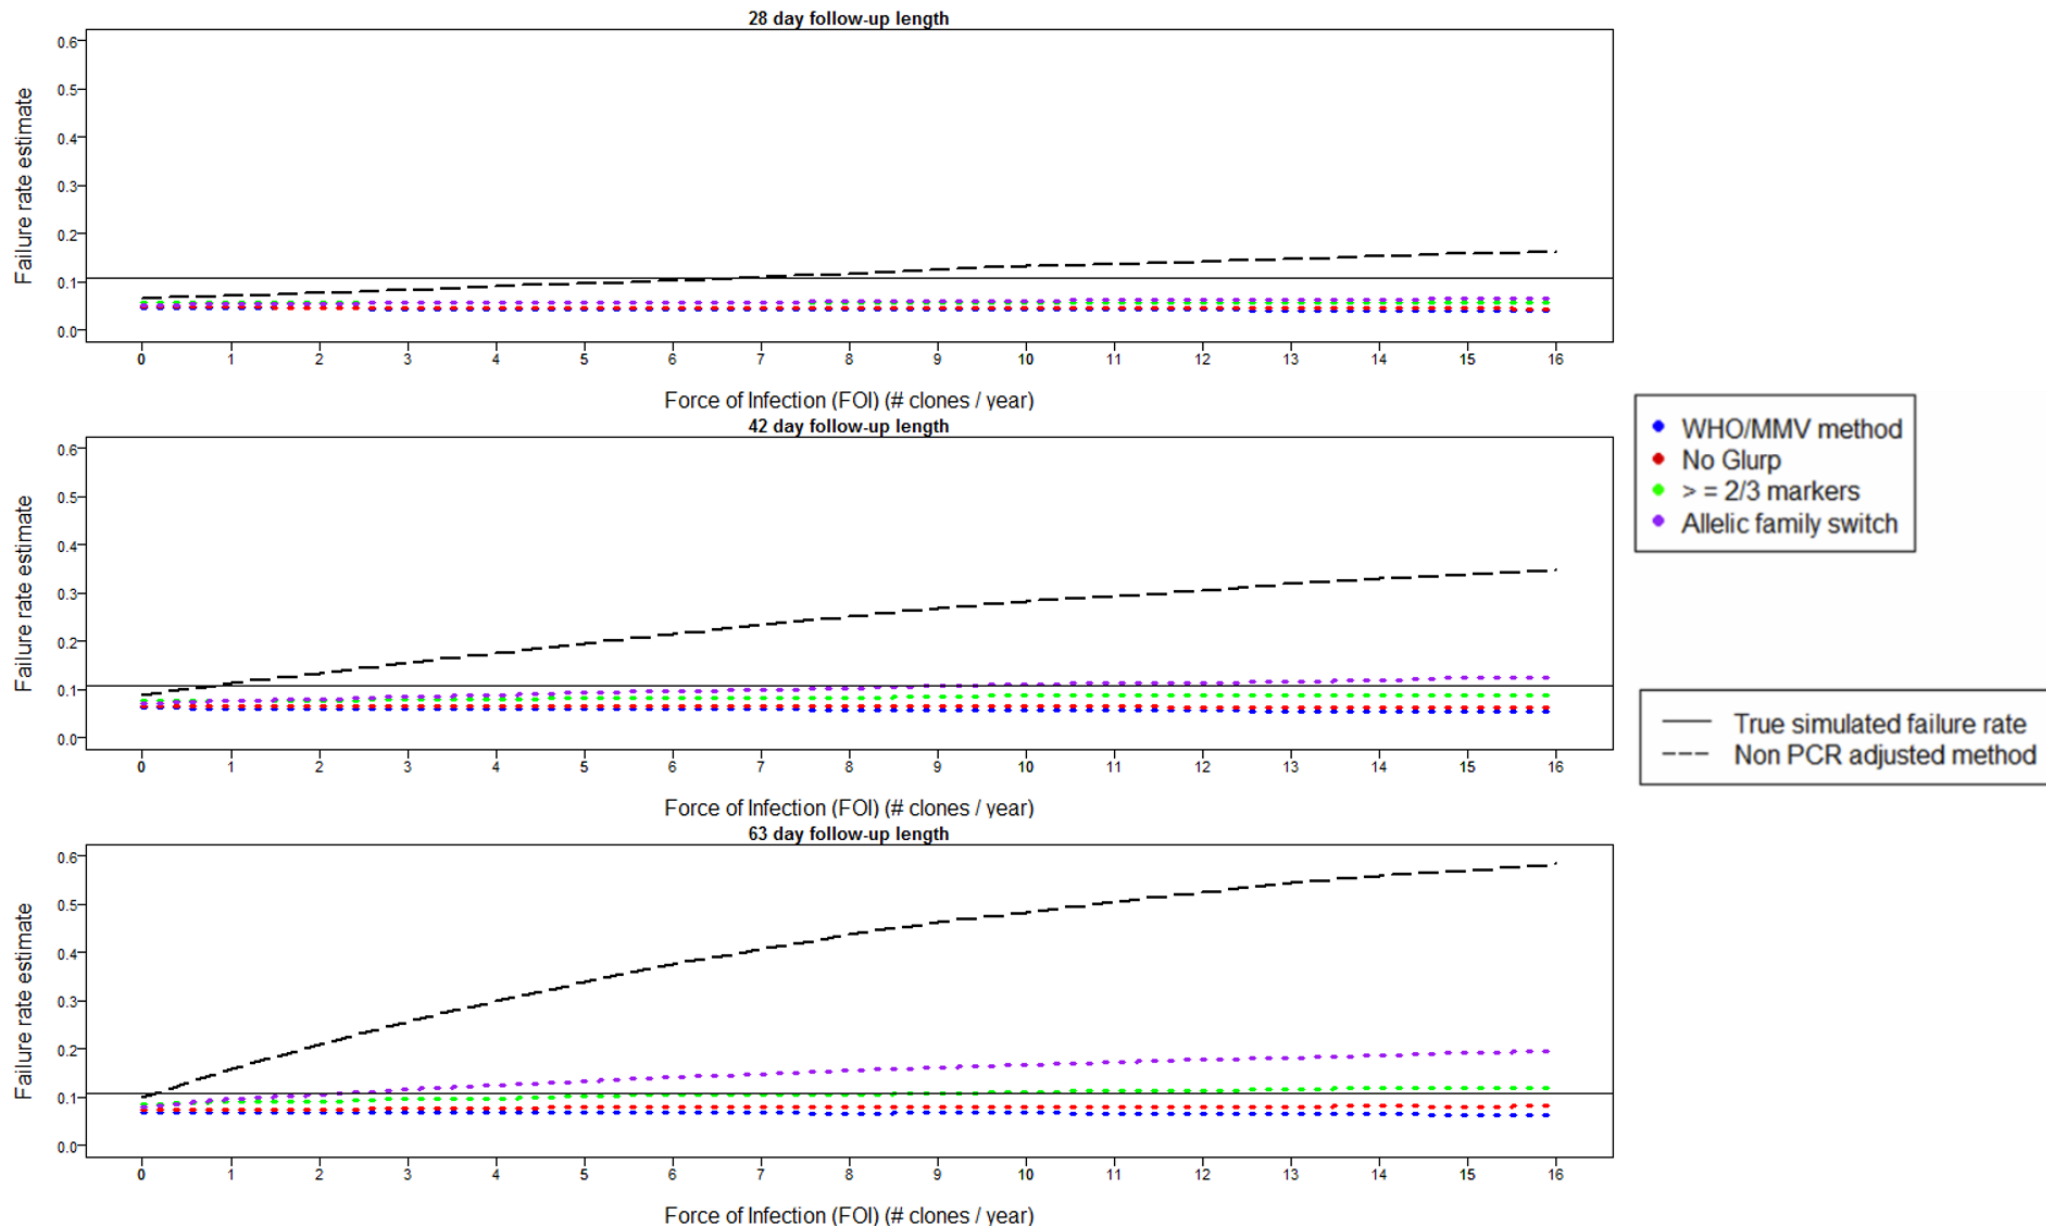

Figure S3: Analysis of simulated trial data for DHA-PPQ using a three compartment model (see Table S2 ) with follow-up lengths of (A) 28 days, (b) 42 days and (C) 63 days. Estimated failure rates are shown for the different algorithms of molecular correction as a function of FOI and calculated using survival analysis.

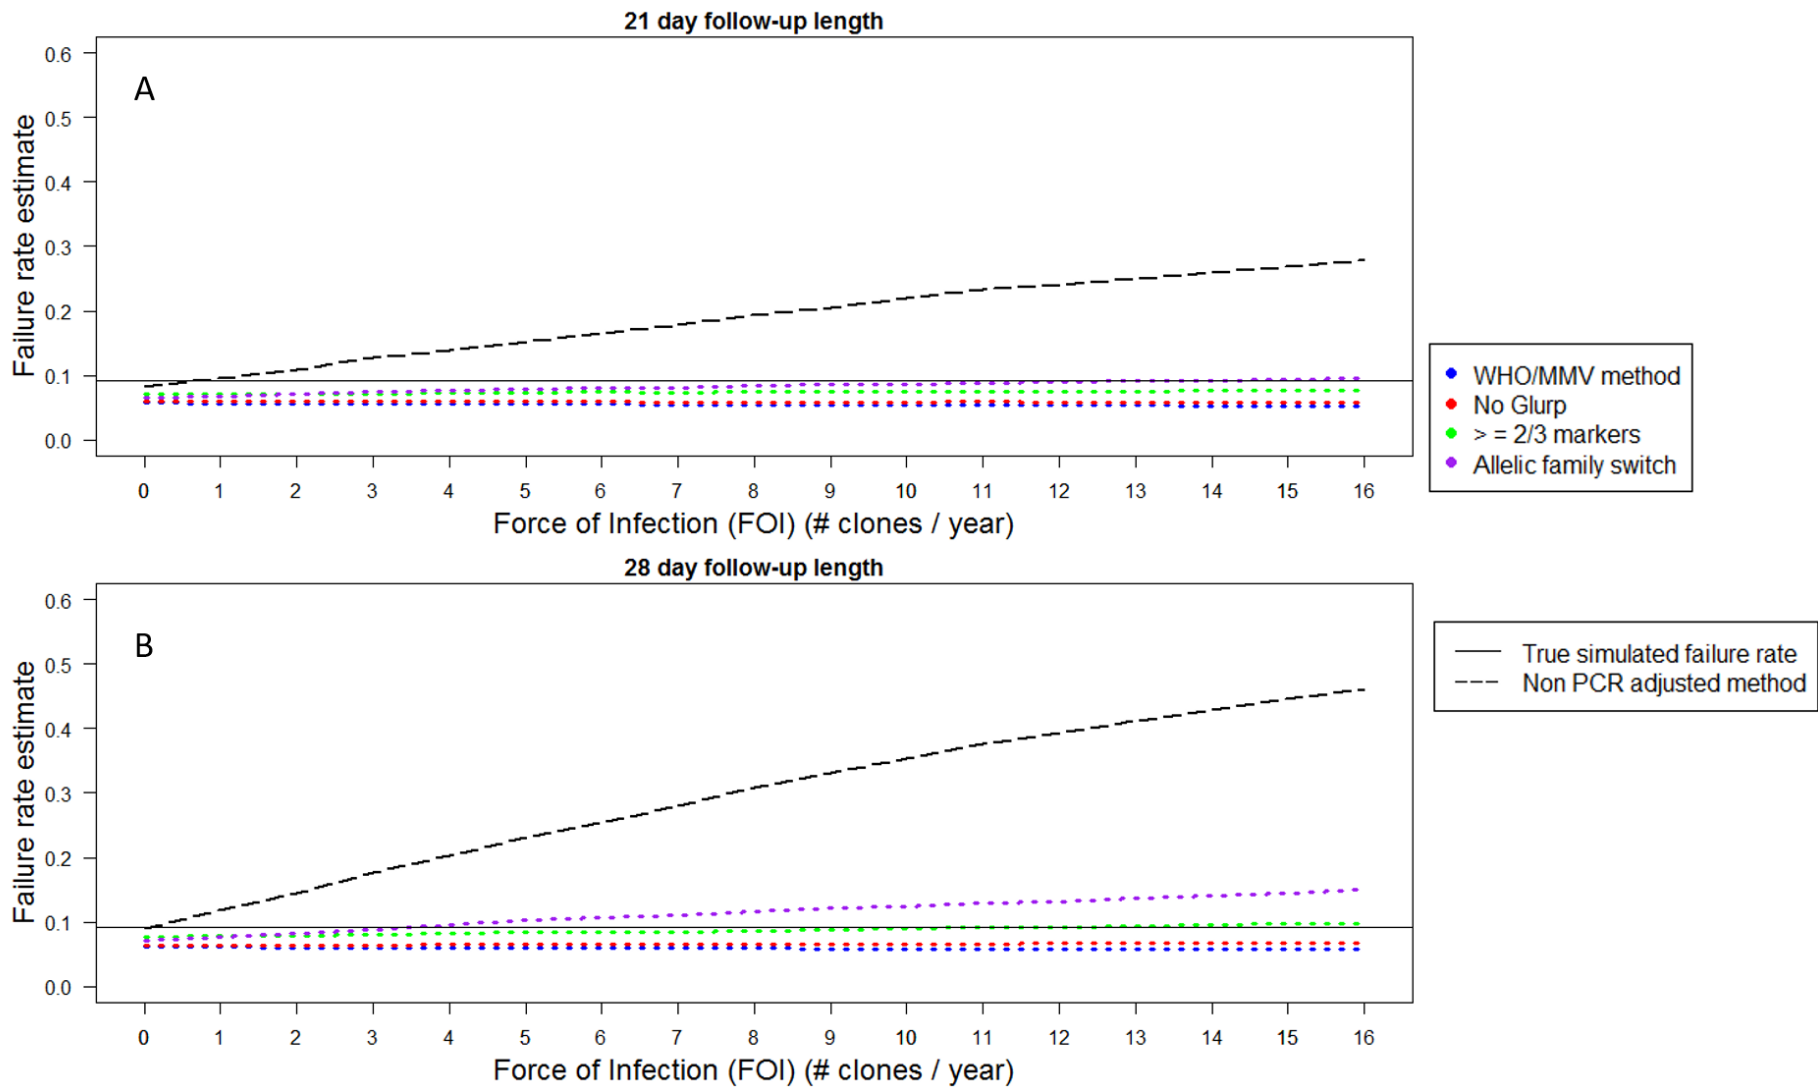

Figure S4 : Analysis of simulated trial data for failing AR-LF with follow-up lengths of 21 days (A) and 28 days (B). Estimated failure rates are shown for the different algorithms of molecular correction as a function of FOI and calculated using survival analysis.

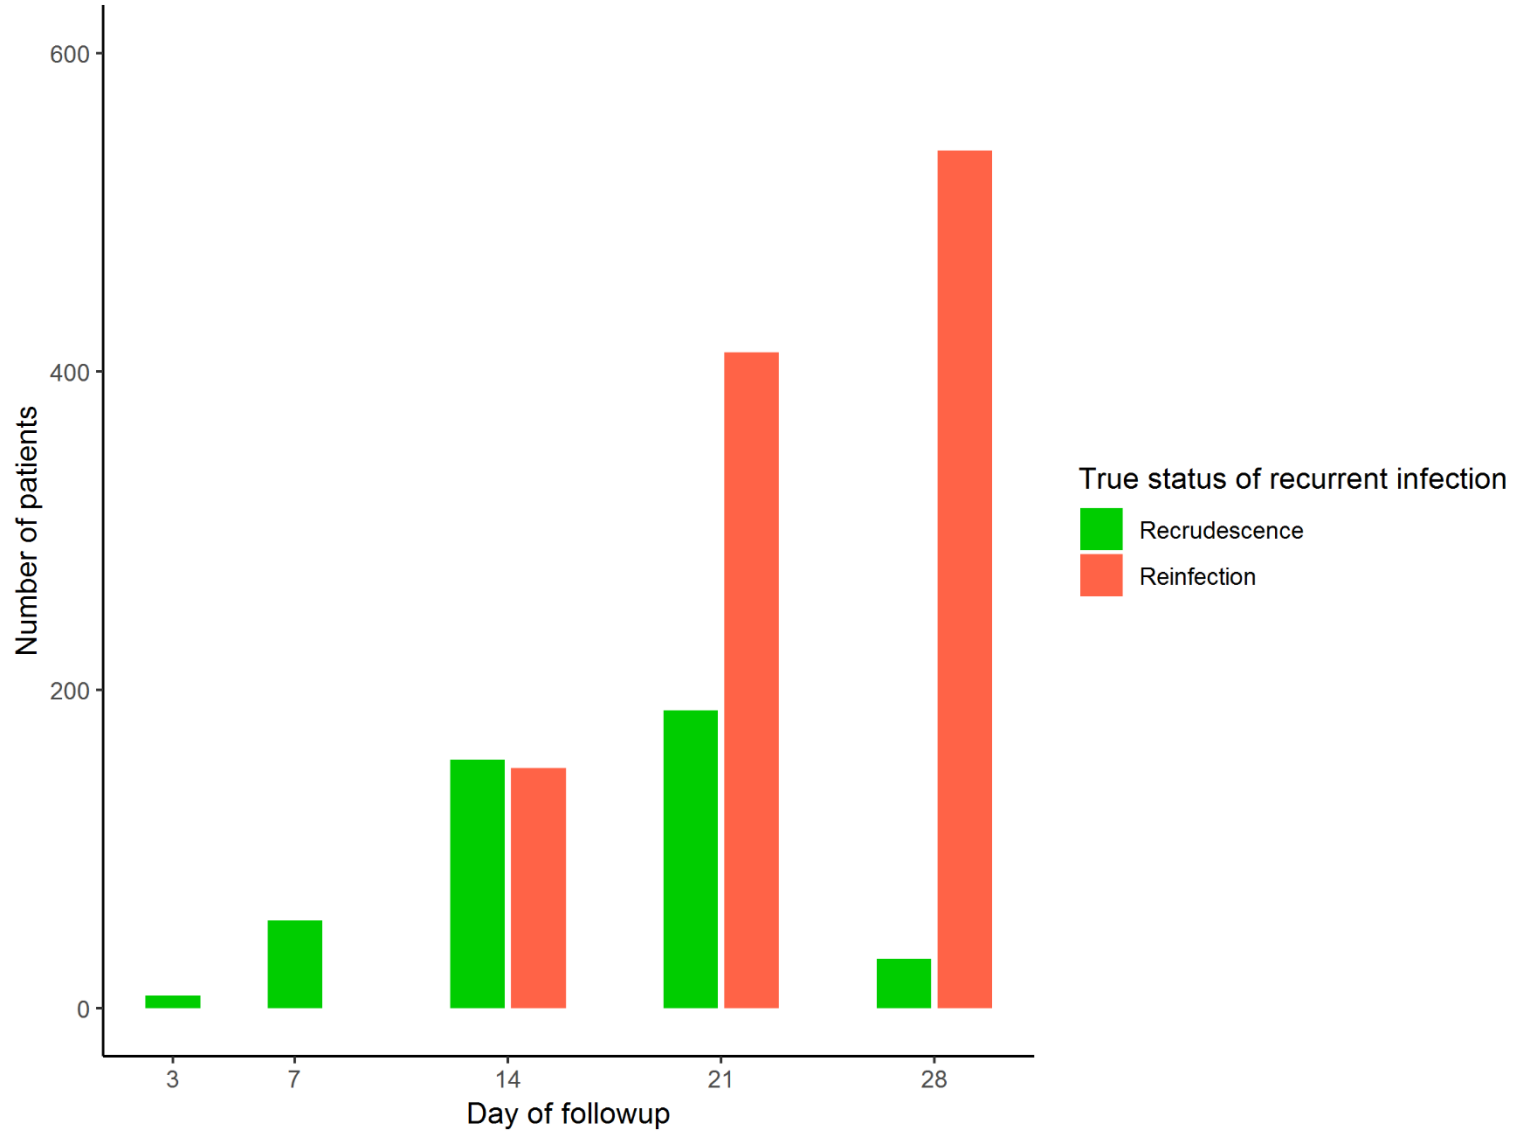



Figure S5 : The true status of recurrent infections on each day of follow-up for a simulated trial of AR-LF with a true simulated failure rate of 9% and an FOI of 8. The total height of the bars indicates the number of recurrent infections detected on that day of follow-up, and the color-coding shows the number of those recurrent infections that were truly recrudescence or reinfections.

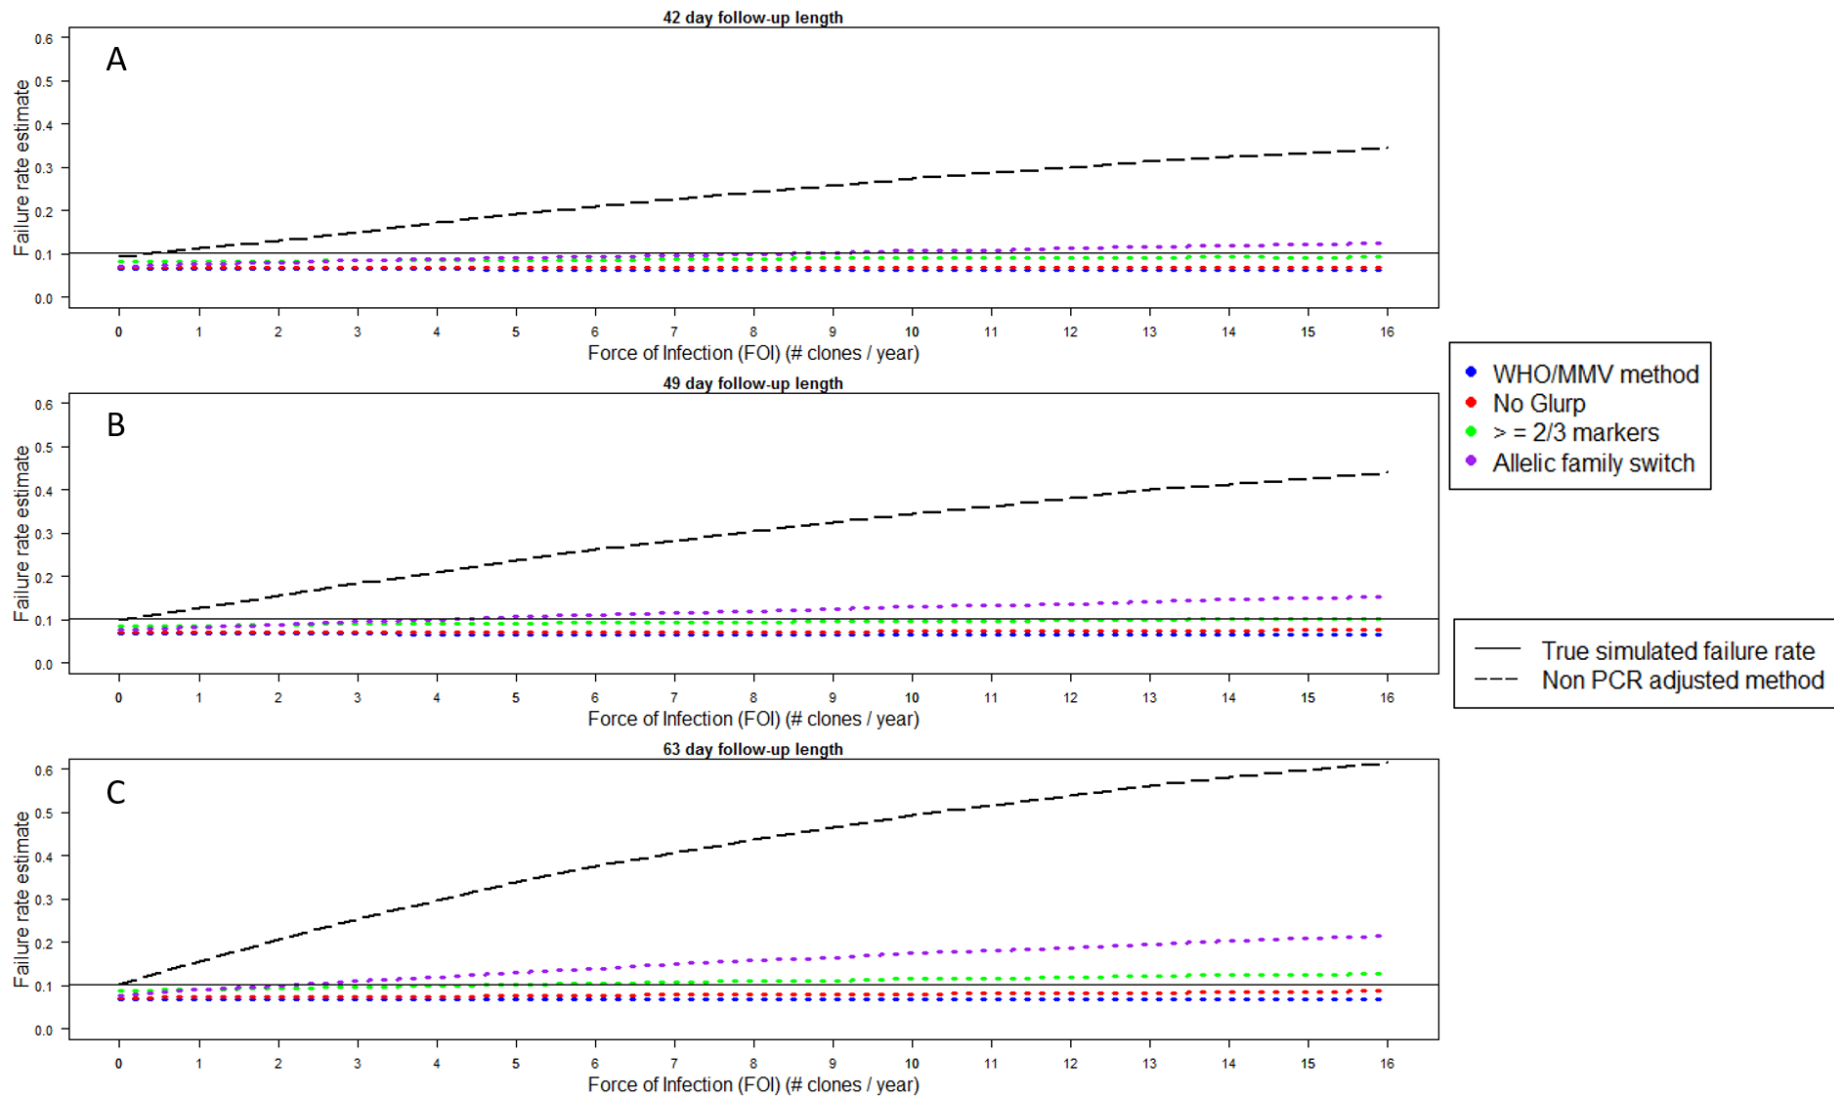

Figure S6 : Analysis of simulated trial data for failing AS-MQ with follow-up lengths of 42 days (A), 49 days (B) and 63 days (C). Estimated failure rates are shown for the different algorithms of molecular correction as a function of FOI and calculated using survival analysis.

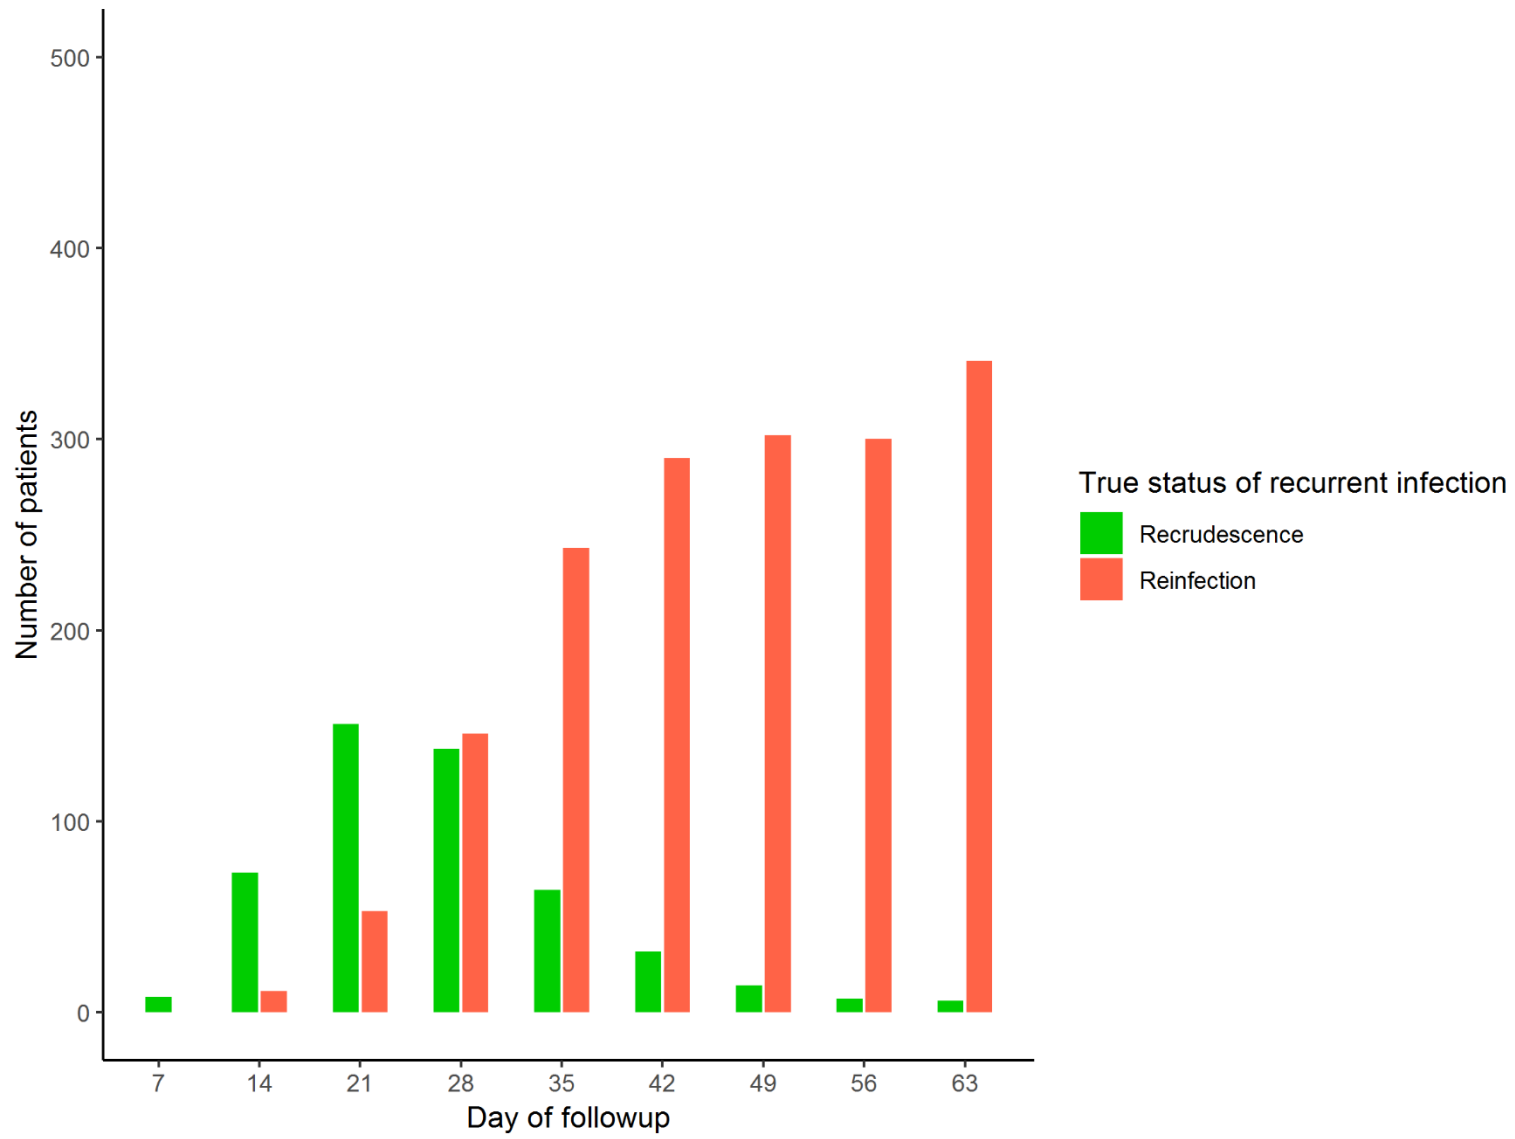

Figure S7 : The true status of recurrent infections on each day of follow-up for a simulated trial of AS-MQ with a true simulated failure rate of 10% and an FOI of 8. The total height of the bars indicates the number of recurrent infections detected on that day of follow-up, and the color-coding shows the number of those recurrent infections that were truly recrudescence or reinfections.

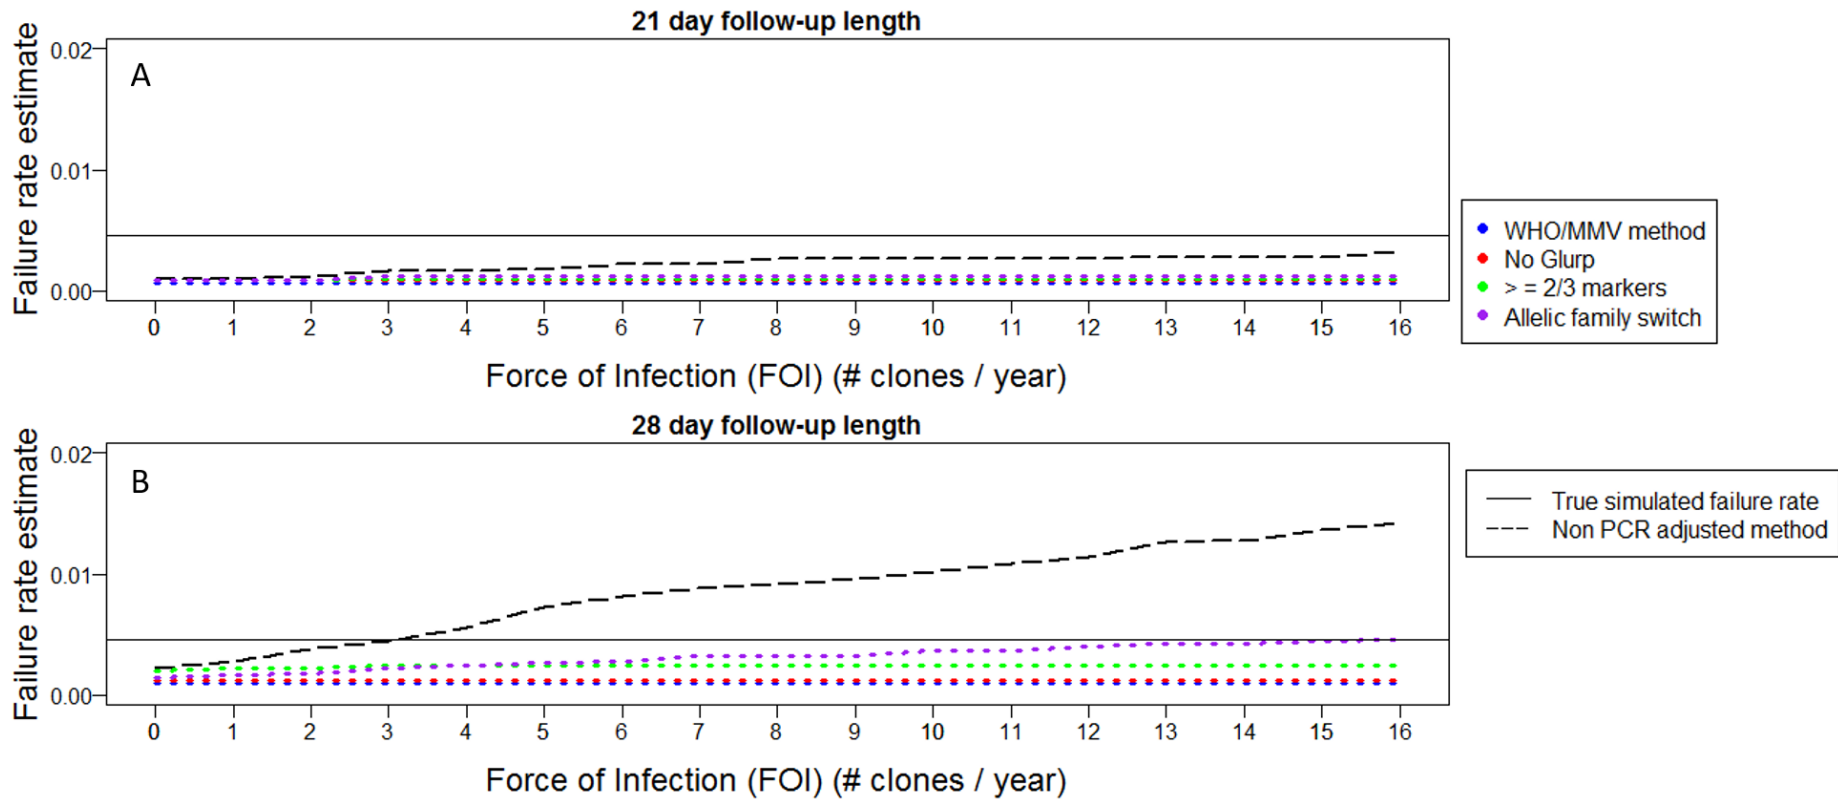

Figure S8 : Analysis of simulated trial data for effective AR-LF with follow-up lengths of 21 days (A) and 28 days (B). Estimated failure rates are shown for the different algorithms of molecular correction as a function of FOI and calculated using survival analysis.

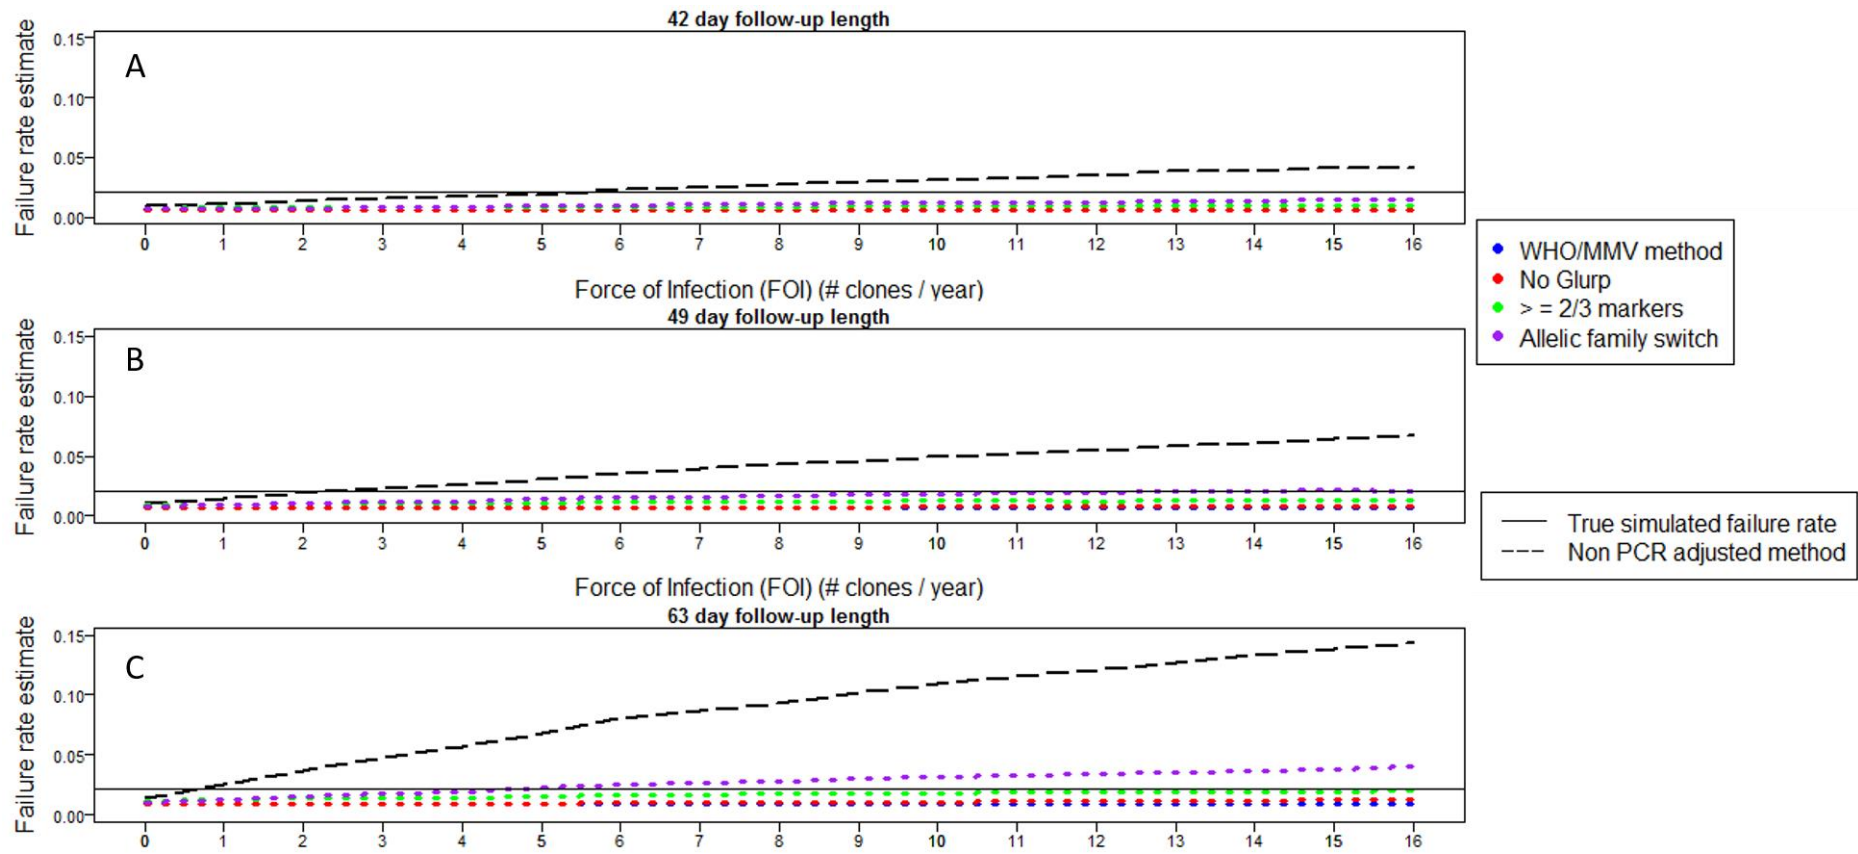

Figure S9 : Analysis of simulated trial data for effective AS-MQ with follow-up lengths of 42 days (A), 49 days (B) and 63 days (C). Estimated failure rates are shown for the different algorithms of molecular correction as a function of FOI and calculated using survival analysis.

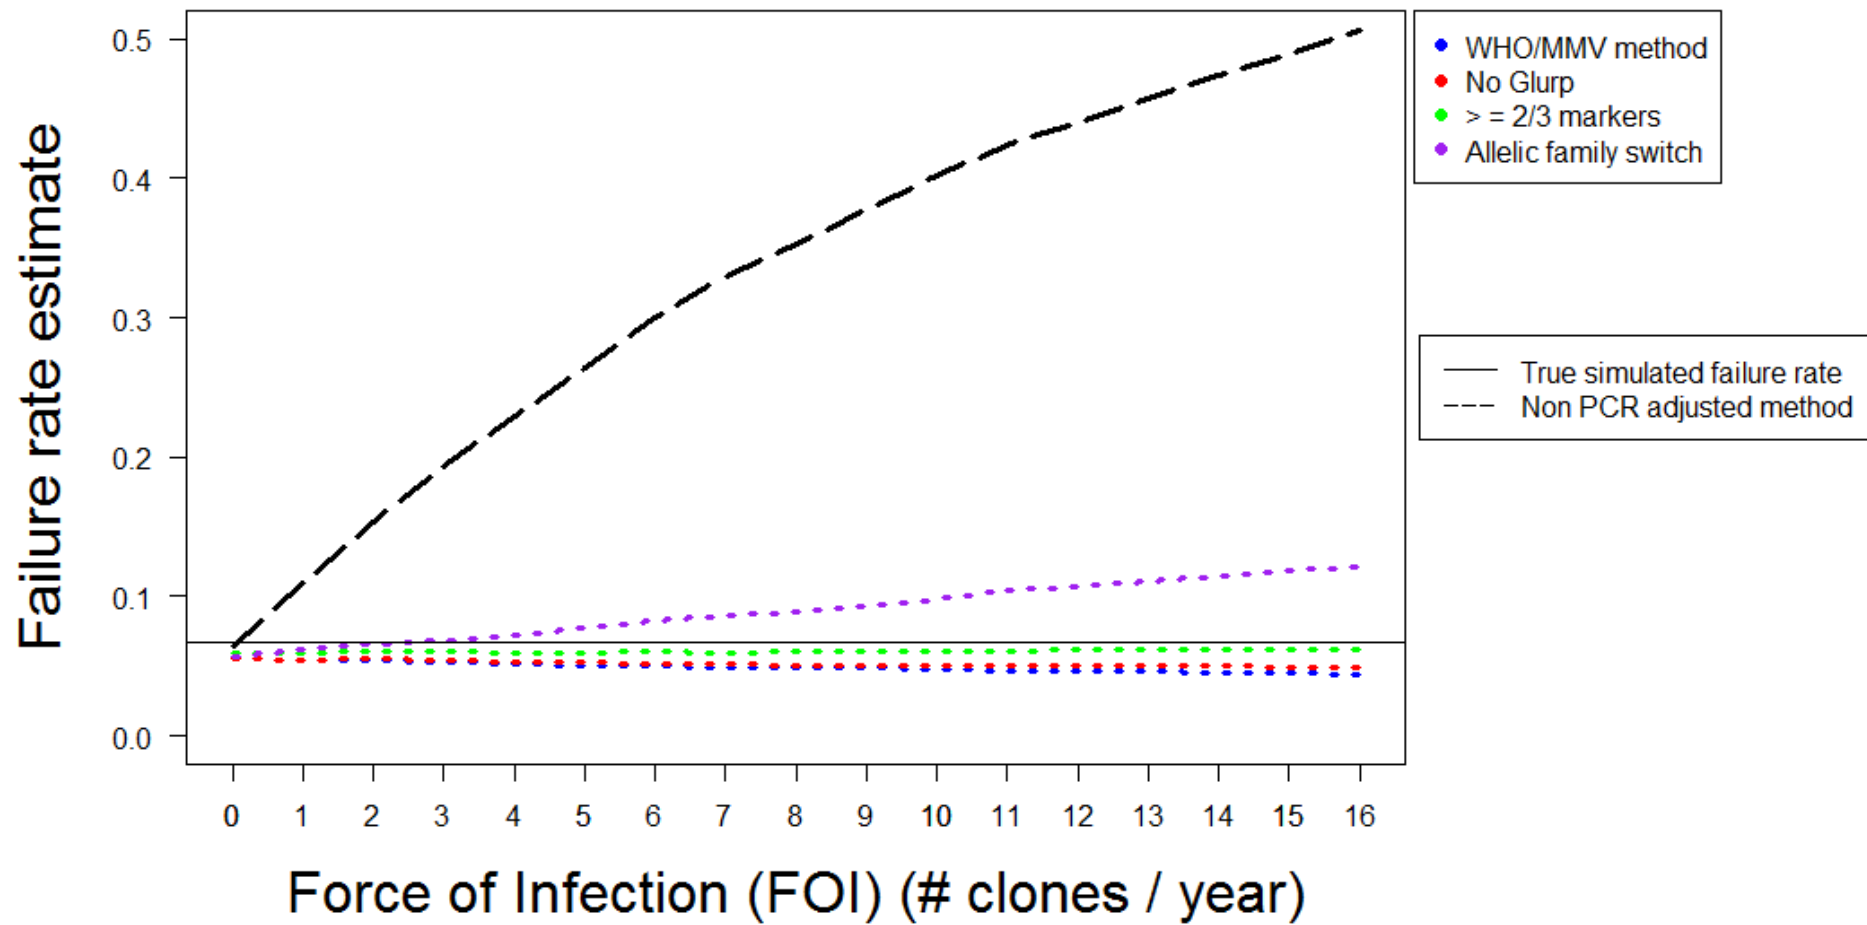

Figure S10: Analysis of simulated trial data for DHA-PPQ with a follow-up period of 42 days in a low MOI setting. Estimated failure rates are shown for the different algorithms of molecular correction as a function of FOI and calculated using survival analysis.

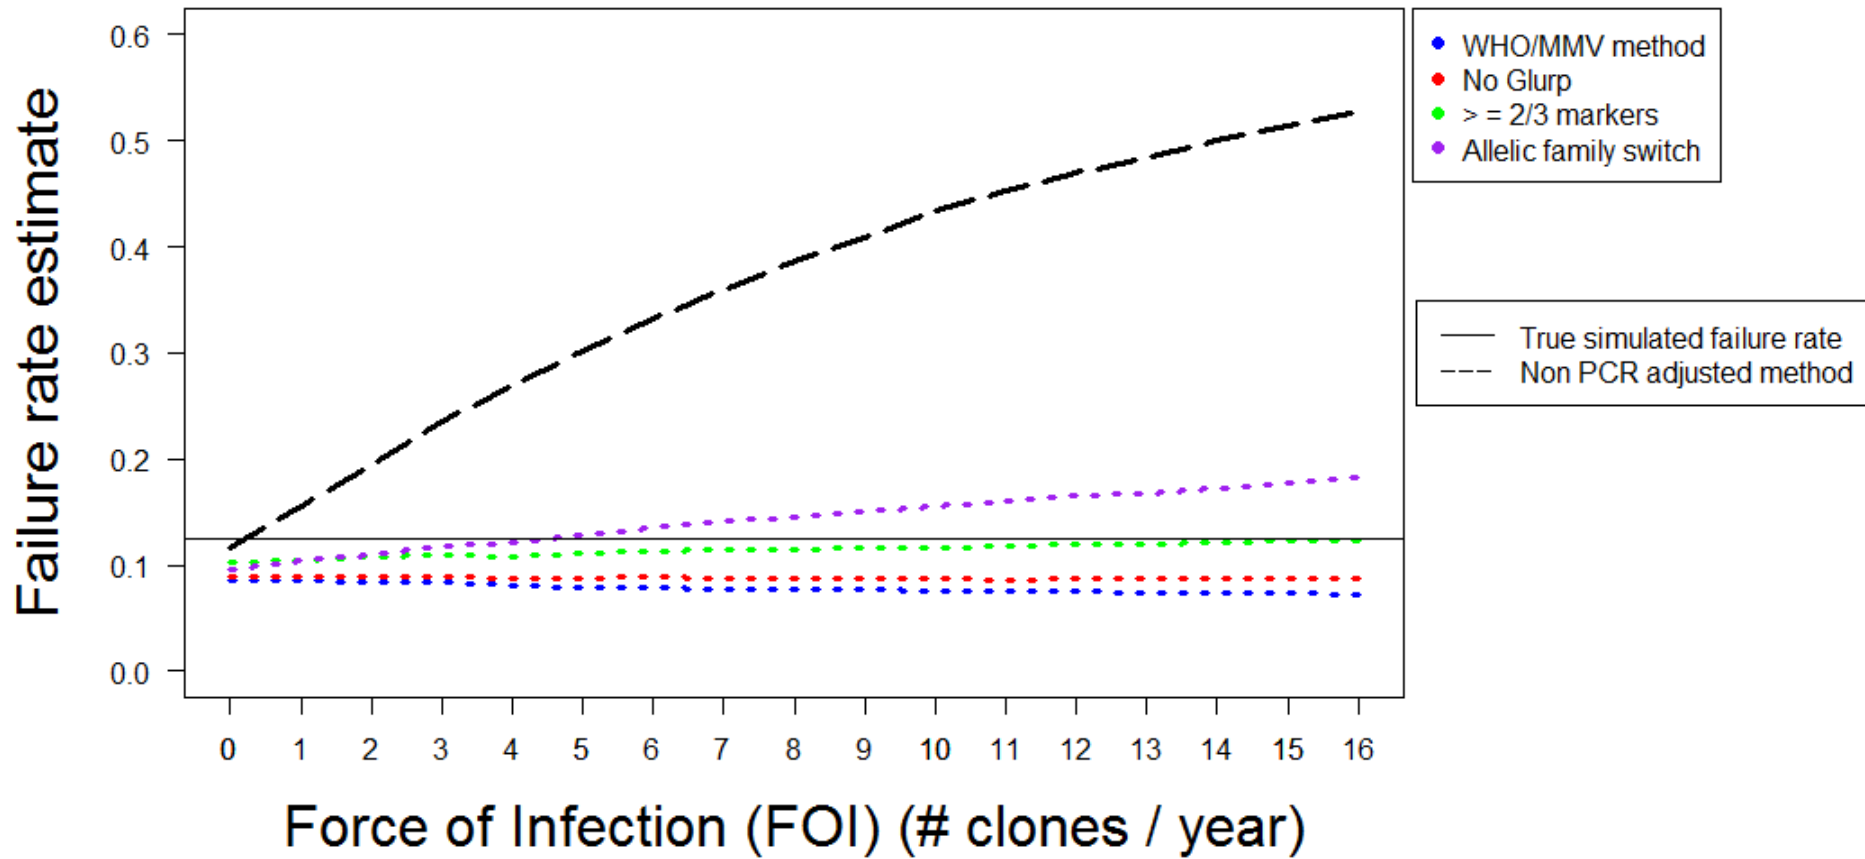

Figure S11: Analysis of simulated trial data for DHA-PPQ with a follow-up period of 42 days with the relative detectability of the longest allele to the shortest allele set to be 0.1:1. Estimated failure rates are shown for the different algorithms of molecular correction as a function of FOI and calculated using survival analysis.



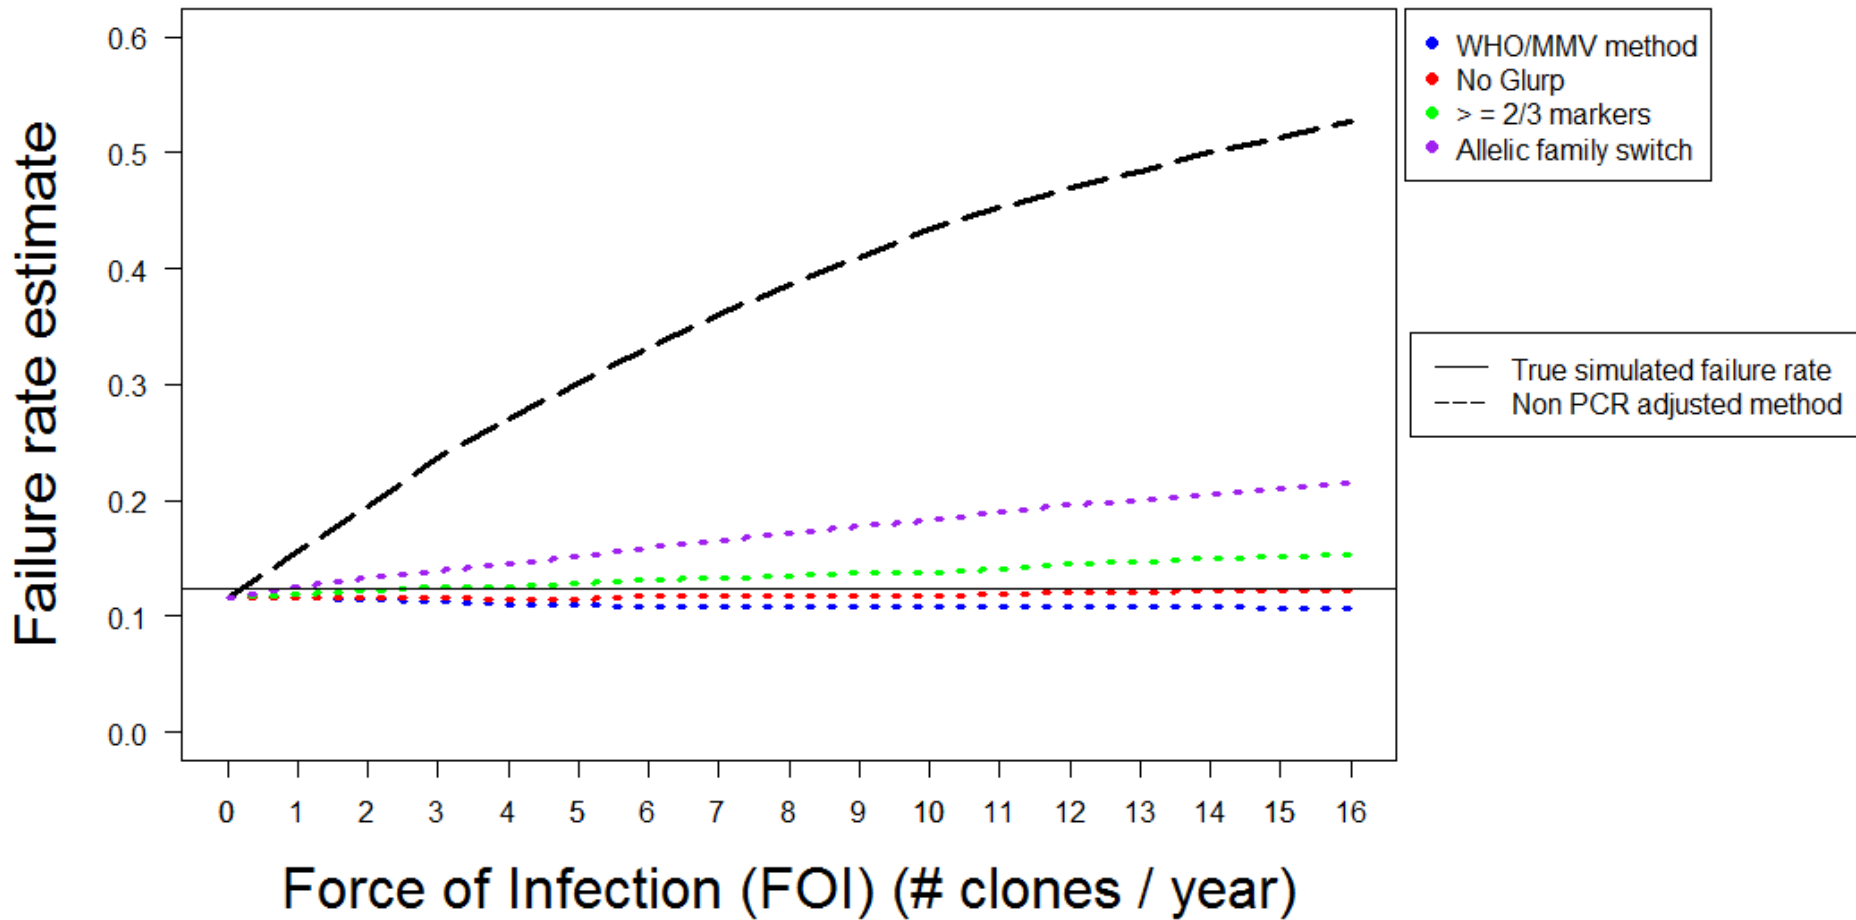

Figure S12: Analysis of simulated trial data for DHA-PPQ with a follow-up period of 42 days and a minority allele detection threshold of 0.05. Estimated failure rates are shown for the different algorithms of molecular correction as a function of FOI and calculated using survival analysis.

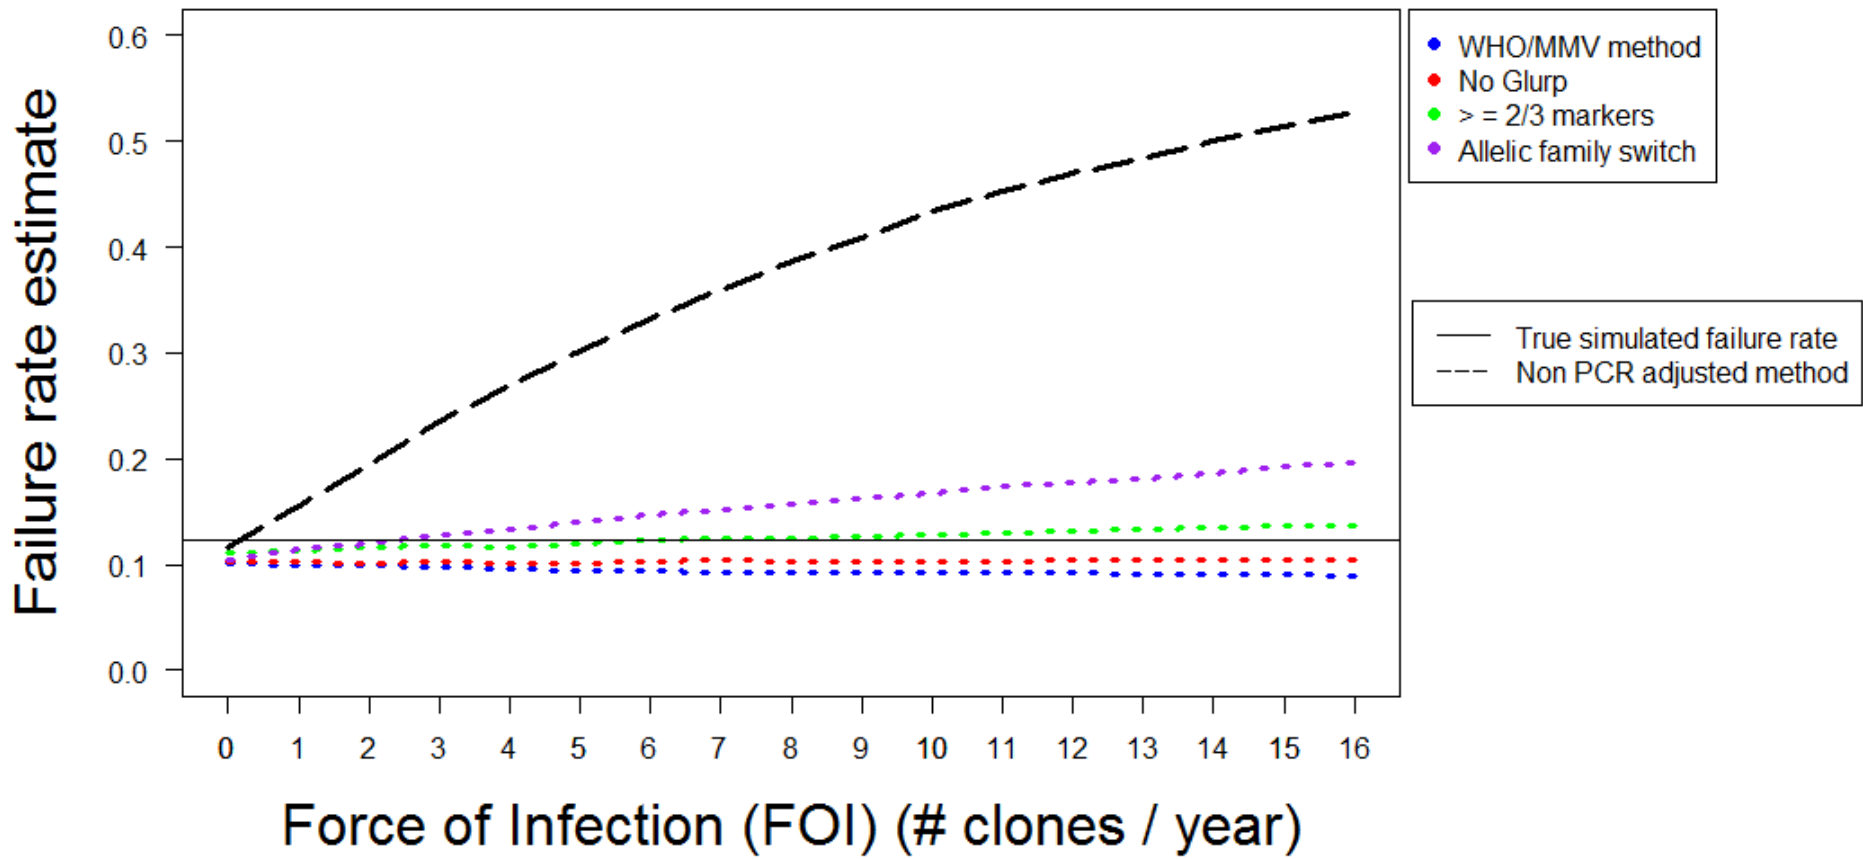

Figure S13: Analysis of simulated trial data for DHA-PPQ with a follow-up period of 42 days and a minority allele detection threshold of 0.2. Estimated failure rates are shown for the different algorithms of molecular correction as a function of FOI and calculated using survival analysis.

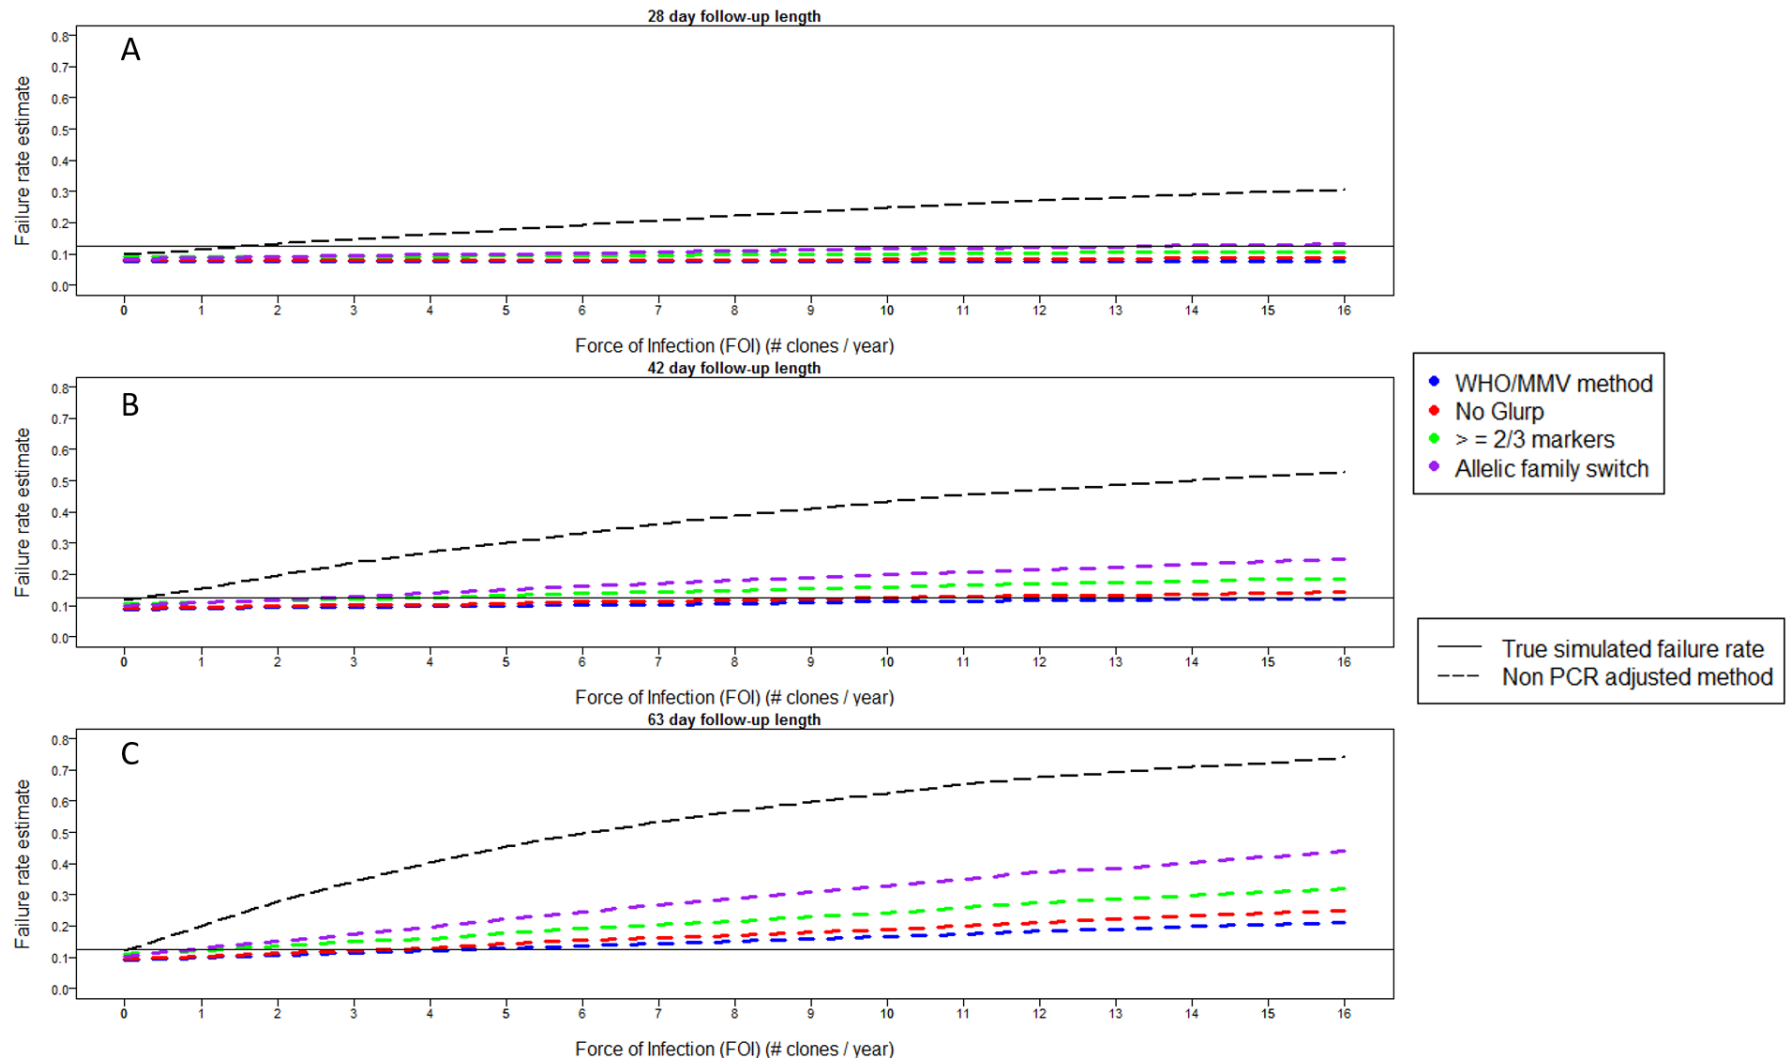

Figure S14: Analysis of simulated trial data for DHA-PPQ with follow-up lengths of 28 days (A), 42 days (B) and 63 days (C). Estimated failure rates are shown for the different algorithms of molecular correction as a function of FOI and calculated using the per protocol method.

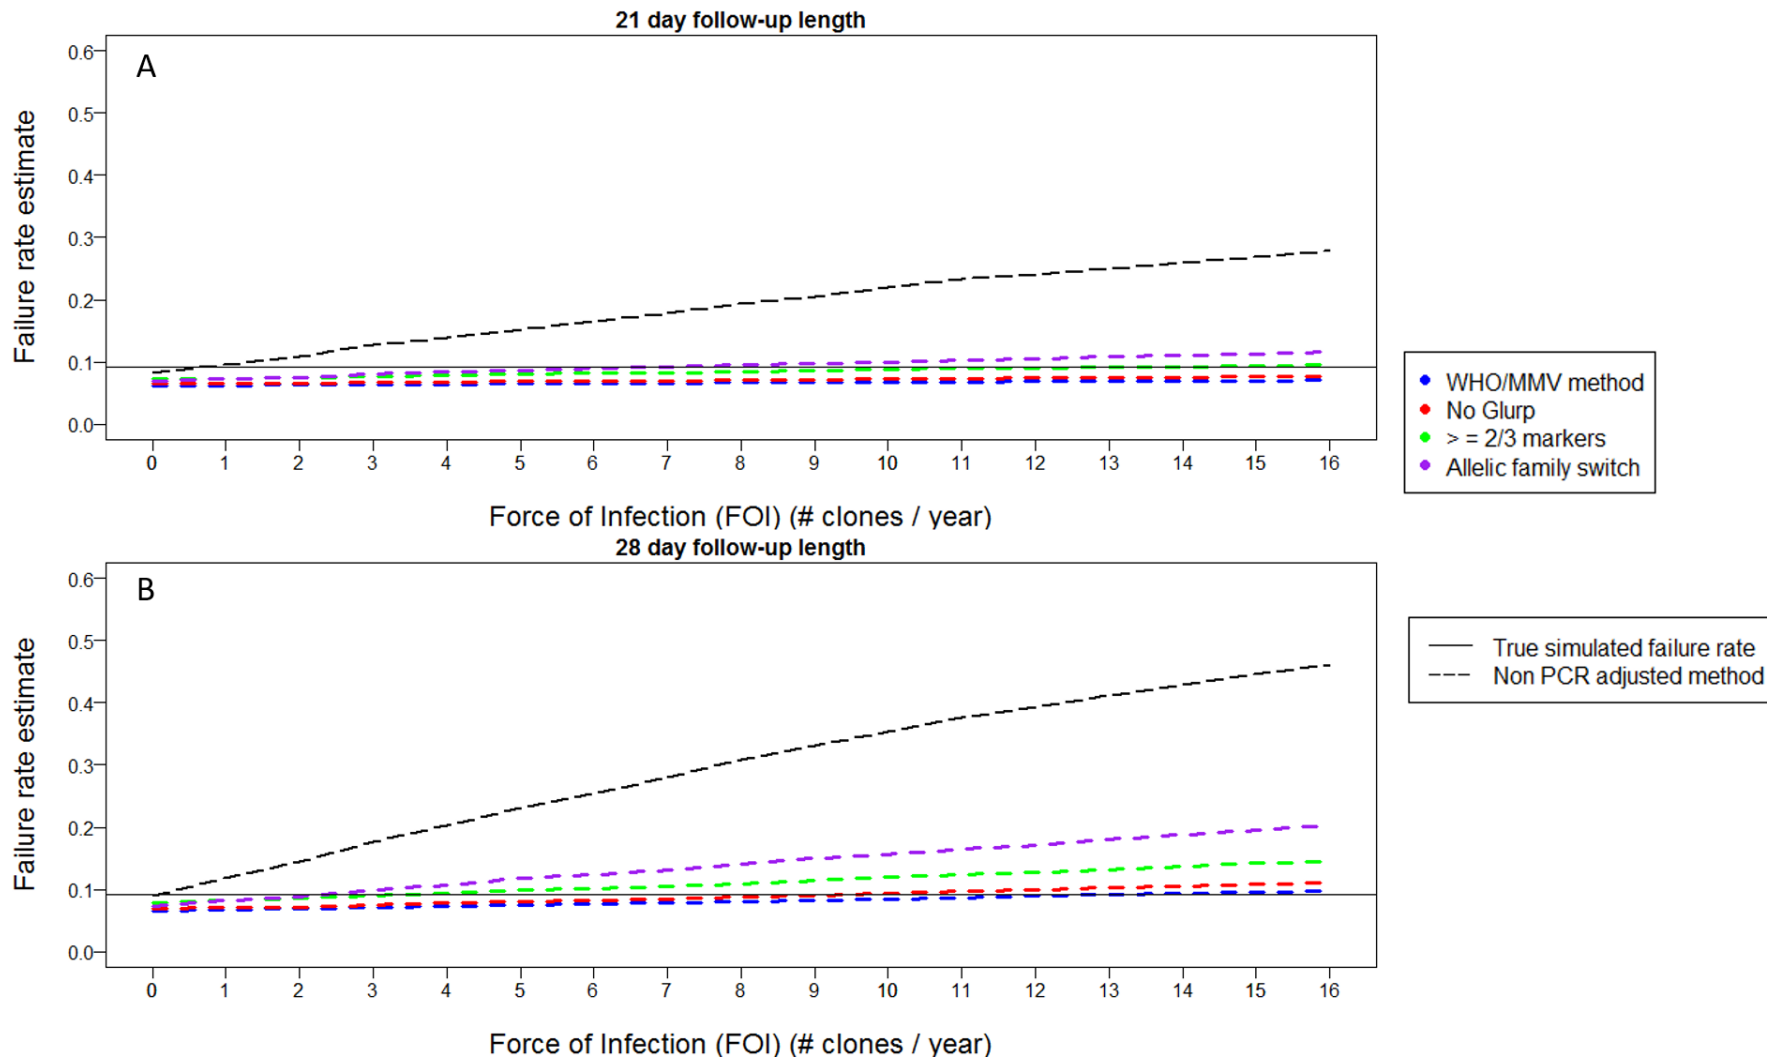

Figure S15: Analysis of simulated trial data for failing AR-LF with follow-up lengths of 21 days (A) and 28 days (B). Estimated failure rates are shown for the different algorithms of molecular correction as a function of FOI and calculated using the per protocol method.

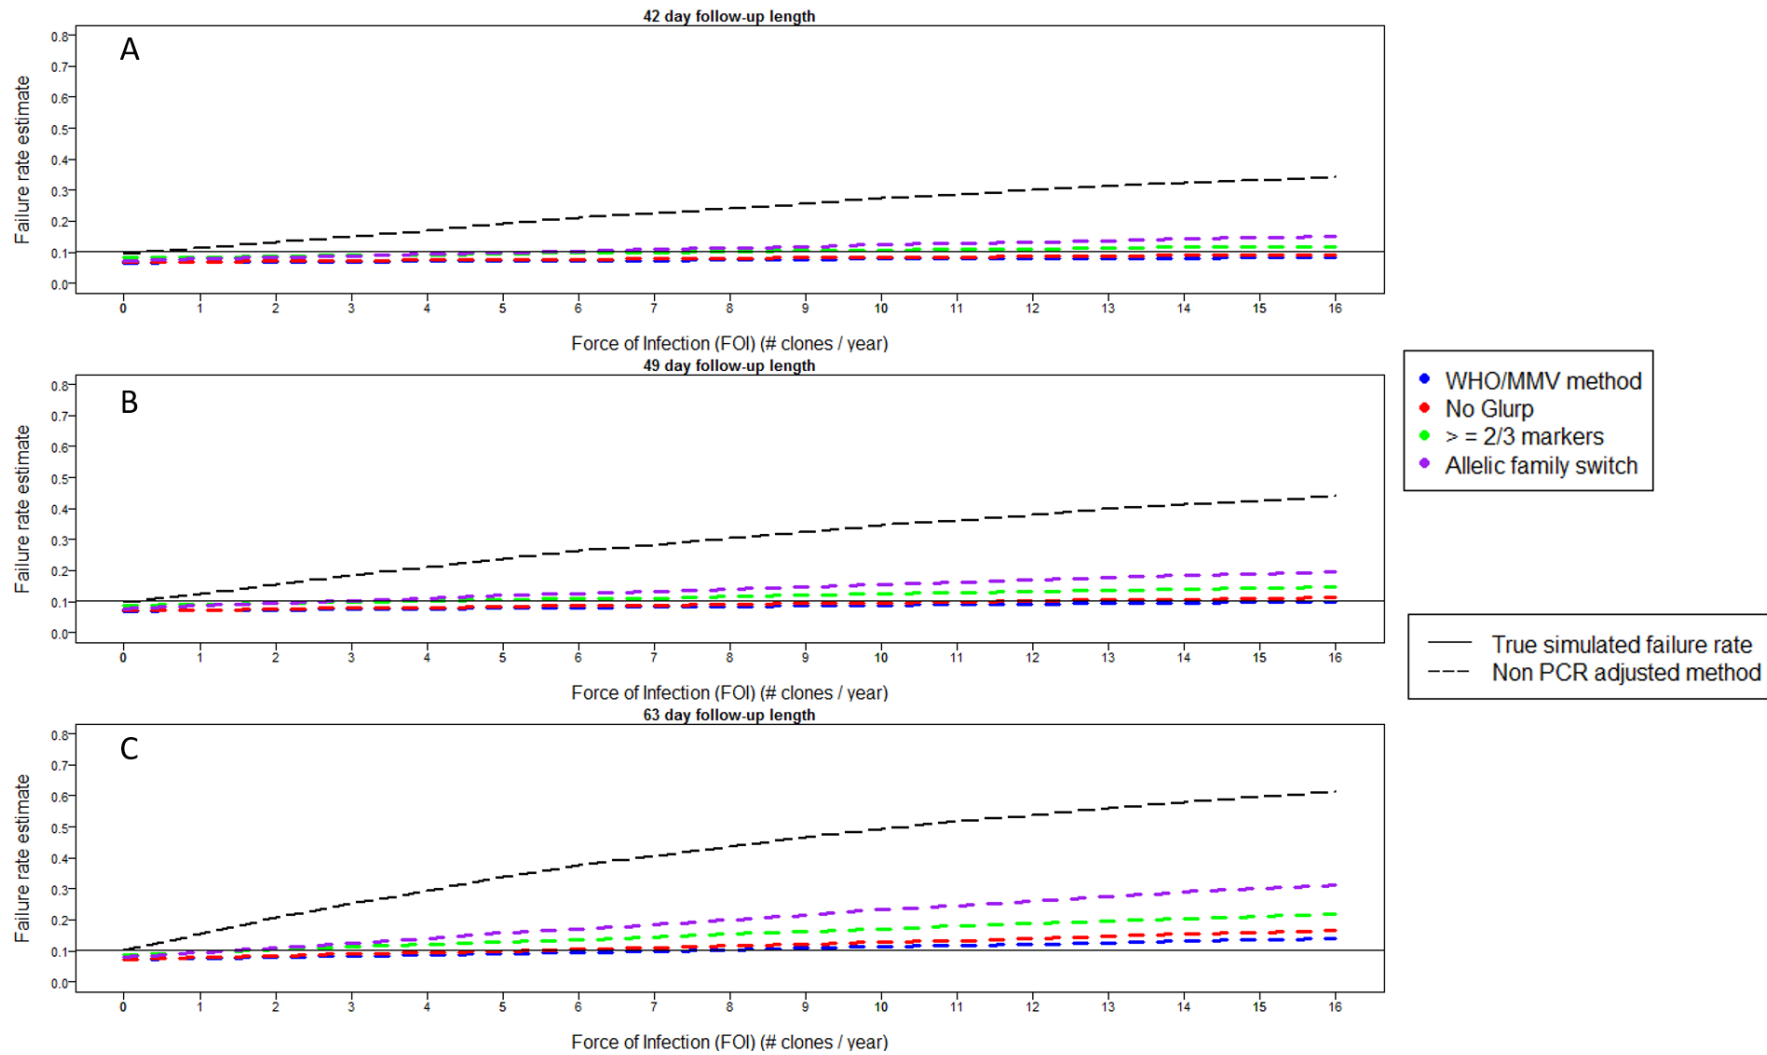

Figure S16 : Analysis of simulated trial data for failing AS-MQ with follow-up lengths of 42 days (A), 49 days (B) and 63 days (C). Estimated failure rates are shown for the different algorithms of molecular correction as a function of FOI and calculated using the per protocol method.

## References

1. Kay K, Hastings IM. 2013. Improving Pharmacokinetic-Pharmacodynamic Modeling to Investigate Anti-Infective Chemotherapy with Application to the Current Generation of Antimalarial Drugs. *PLoS Comput Biol* 9:e1003151.
2. Kay K, Hastings IM. 2015. Measuring windows of selection for anti-malarial drug treatments. *Malaria Journal* 14:292.
3. Winter K, Hastings IM. 2011. Development, evaluation, and application of an in silico model for antimalarial drug treatment and failure. *Antimicrob Agents Chemother* 55:3380-92.
4. Kay K, Hodel EM, Hastings IM. 2014. Improving the role and contribution of pharmacokinetic analyses in antimalarial drug clinical trials. *Antimicrob Agents Chemother* 58:5643-9.
5. Kay K, Hodel EM, Hastings IM. 2015. Altering Antimalarial Drug Regimens May Dramatically Enhance and Restore Drug Effectiveness. *Antimicrobial Agents and Chemotherapy* 59:6419-6427.
6. Saunders DL, Vanachayangkul P, Lon C. 2014. Dihydroartemisinin–Piperaquine Failure in Cambodia. *New England Journal of Medicine* 371:484-485.
7. World Health Organization. 2009. Methods for surveillance of antimalarial drug efficacy.
8. Tarning J, Rijken MJ, McGready R, Phyo AP, Hanpithakpong W, Day NP, White NJ, Nosten F, Lindegardh N. 2012. Population pharmacokinetics of dihydroartemisinin and piperaquine in pregnant and nonpregnant women with uncomplicated malaria. *Antimicrob Agents Chemother* 56:1997-2007.
9. Stepniewska K, Taylor W, Sirima S, Ouedraogo E, Ouedraogo A, Gansane A, Simpson J, Morgan C, White N, Kiechel J-R. 2009. Population pharmacokinetics of artesunate and amodiaquine in African children. *Malaria Journal* 8:200.

10. Hong KB. 2014. Pharmacological modelling of the efficacy and safety of fixed-dose versus non-fixed dose combinations of the antimalarial drug artesunate-amodiaquine. MSc. Liverpool School of Tropical Medicine, Liverpool.
11. Htay MNN. 2014. Pharmacological modelling of intermittent preventative treatment in pregnancy with sulphadoxine-pyrimethamine. MSc. Liverpool School of Tropical Medicine, Liverpool.
12. Mueller I, Schoepflin S, Smith TA, Benton KL, Bretscher MT, Lin E, Kiniboro B, Zimmerman PA, Speed TP, Siba P, Felger I. 2012. Force of infection is key to understanding the epidemiology of *Plasmodium falciparum* malaria in Papua New Guinean children. *Proc Natl Acad Sci U S A* 109:10030-5.
13. Felger I, Maire M, Bretscher MT, Falk N, Tiaden A, Sama W, Beck H-P, Owusu-Agyei S, Smith TA. 2012. The Dynamics of Natural *Plasmodium falciparum* Infections. *PLOS ONE* 7:e45542.
14. Smith T, Maire N, Dietz K, Killeen G, Vounatsou P, Molineaux L. 2006. Relationships between the entomological inoculation rate and the force of infection for *Plasmodium falciparum* malaria. *Am J Trop Med Hyg* 75:11 - 18.
15. Dahal P, Simpson JA, Dorsey G, Guérin PJ, Price RN, Stepniewska K. 2017. Statistical methods to derive efficacy estimates of anti-malarials for uncomplicated *Plasmodium falciparum* malaria: pitfalls and challenges. *Malaria Journal* 16:430.
16. Lerch A, al. e. 2018. Development of amplicon deep sequencing markers and data analysis pipeline for genotyping multi-clonal malaria infections. *BMC Genomics* in press.
17. Plucinski MM, Morton L, Bushman M, Dimbu PR, Udhayakumar V. 2015. Robust Algorithm for Systematic Classification of Malaria Late Treatment Failures as Recrudescence or Reinfection Using Microsatellite Genotyping. *Antimicrob Agents Chemother* 59:6096-100.
18. Greenhouse B, Myrick A, Dokomajilar C, Woo JM, Carlson EJ, Rosenthal PJ, Dorsey G. 2006. VALIDATION OF MICROSATELLITE MARKERS FOR USE IN GENOTYPING POLYCLONAL *PLASMODIUM FALCIPARUM* INFECTIONS. *The American journal of tropical medicine and hygiene* 75:836-842.

19. Plucinski MM, Morton L, Bushman M, Dimbu PR, Udhayakumar V. 2015. Robust algorithm for systematic classification of malaria late treatment failures as recrudescence or reinfection using microsatellite genotyping. *Antimicrob Agents Chemother* 59.
20. Hodel EM, Kay K, Hayes DJ, Terlouw DJ, Hastings IM. 2014. Optimizing the programmatic deployment of the anti-malarials artemether-lumefantrine and dihydroartemisinin-piperaquine using pharmacological modelling. *Malar J* 13:138.
21. Kay K, Hodel EM, Hastings IM. 2015. Altering antimalarial drug regimens may dramatically enhance and restore drug effectiveness. *Antimicrobial Agents and Chemotherapy* doi:10.1128/aac.00482-15.
22. Staehli Hodel EM, Guidi M, Zanolari B, Mercier T, Duong S, Kabanywany AM, Ariey F, Buclin T, Beck H-P, Decosterd LA, Olliaro P, Genton B, Csajka C. 2013. Population pharmacokinetics of mefloquine, piperaquine and artemether-lumefantrine in Cambodian and Tanzanian malaria patients. *Malaria journal* 12:235-235.
